# Supplementary material for: Factors influencing the safety of outpatient coronary CT angiography: a clinical registry study
Source: PubMed Central journal article supplement — BMJ Open. 2022 Aug 8;12(8):e058304. doi: 10.1136/bmjopen-2021-058304 (PMC9364403; doi:10.1136/bmjopen-2021-058304), 2022-08-08
Supplement: bmjopen-2021-058304.draft_revisions.pdf [file bmjopen-2021-058304.draft_revisions.pdf]

# BMJ Open

BMJ Open is committed to open peer review. As part of this commitment we make the peer review history of every article we publish publicly available.

When an article is published we post the peer reviewers' comments and the authors' responses online. We also post the versions of the paper that were used during peer review. These are the versions that the peer review comments apply to.

The versions of the paper that follow are the versions that were submitted during the peer review process. They are not the versions of record or the final published versions. They should not be cited or distributed as the published version of this manuscript.

BMJ Open is an open access journal and the full, final, typeset and author-corrected version of record of the manuscript is available on our site with no access controls, subscription charges or pay-per-view fees (<http://bmjopen.bmj.com>).

If you have any questions on BMJ Open's open peer review process please email [info.bmjopen@bmj.com](mailto:info.bmjopen@bmj.com)

# BMJ Open

## Factors Influencing the Safety of Coronary Computed Tomography Angiography – a Clinical Registry Study

|                               |                                                                                                                                                                                                                                                                                                                                                                                                                                                                                                                                                                                                                                                                                                                                                                                                                                                                                                                                                                                                                                                                               |
|-------------------------------|-------------------------------------------------------------------------------------------------------------------------------------------------------------------------------------------------------------------------------------------------------------------------------------------------------------------------------------------------------------------------------------------------------------------------------------------------------------------------------------------------------------------------------------------------------------------------------------------------------------------------------------------------------------------------------------------------------------------------------------------------------------------------------------------------------------------------------------------------------------------------------------------------------------------------------------------------------------------------------------------------------------------------------------------------------------------------------|
| Journal:                      | <i>BMJ Open</i>                                                                                                                                                                                                                                                                                                                                                                                                                                                                                                                                                                                                                                                                                                                                                                                                                                                                                                                                                                                                                                                               |
| Manuscript ID                 | bmjopen-2021-058304                                                                                                                                                                                                                                                                                                                                                                                                                                                                                                                                                                                                                                                                                                                                                                                                                                                                                                                                                                                                                                                           |
| Article Type:                 | Original research                                                                                                                                                                                                                                                                                                                                                                                                                                                                                                                                                                                                                                                                                                                                                                                                                                                                                                                                                                                                                                                             |
| Date Submitted by the Author: | 14-Oct-2021                                                                                                                                                                                                                                                                                                                                                                                                                                                                                                                                                                                                                                                                                                                                                                                                                                                                                                                                                                                                                                                                   |
| Complete List of Authors:     | <p>Andre, Florian; Heidelberg University, Department of Cardiology, Angiology and Pneumology; Radiology Center Sinsheim Eberbach Erbach Walldorf Heidelberg</p> <p>Fortner, Philipp; Radiology Center Sinsheim Eberbach Erbach Walldorf Heidelberg</p> <p>Emami, Mostafa; Radiology Center Sinsheim Eberbach Erbach Walldorf Heidelberg</p> <p>Seitz, Sebastian; Radiology Center Sinsheim Eberbach Erbach Walldorf Heidelberg</p> <p>Brado, Matthias; Radiology Center Sinsheim Eberbach Erbach Walldorf Heidelberg</p> <p>Gückel, Friedemann; Radiology Center Sinsheim Eberbach Erbach Walldorf Heidelberg</p> <p>Sokiranski, Roman; Radiology Center Sinsheim Eberbach Erbach Walldorf Heidelberg</p> <p>Sommer, André; Radiology Center Sinsheim Eberbach Erbach Walldorf Heidelberg</p> <p>Frey, Norbert; Heidelberg University, Department of Cardiology, Angiology and Pneumology</p> <p>Görich, Johannes; Radiology Center Sinsheim Eberbach Erbach Walldorf Heidelberg</p> <p>Buss, Sebastian J.; Radiology Center Sinsheim Eberbach Erbach Walldorf Heidelberg</p> |
| Keywords:                     | Coronary heart disease < RADIOLOGY, Cardiovascular imaging < RADIOLOGY & IMAGING, Computed tomography < RADIOLOGY & IMAGING, CLINICAL PHARMACOLOGY, Cardiology < INTERNAL MEDICINE                                                                                                                                                                                                                                                                                                                                                                                                                                                                                                                                                                                                                                                                                                                                                                                                                                                                                            |
|                               |                                                                                                                                                                                                                                                                                                                                                                                                                                                                                                                                                                                                                                                                                                                                                                                                                                                                                                                                                                                                                                                                               |

SCHOLARONE™  
Manuscripts

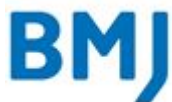

I, the Submitting Author has the right to grant and does grant on behalf of all authors of the Work (as defined in the below author licence), an exclusive licence and/or a non-exclusive licence for contributions from authors who are: i) UK Crown employees; ii) where BMJ has agreed a CC-BY licence shall apply, and/or iii) in accordance with the terms applicable for US Federal Government officers or employees acting as part of their official duties; on a worldwide, perpetual, irrevocable, royalty-free basis to BMJ Publishing Group Ltd ("BMJ") its licensees and where the relevant Journal is co-owned by BMJ to the co-owners of the Journal, to publish the Work in this journal and any other BMJ products and to exploit all rights, as set out in our [licence](#).

The Submitting Author accepts and understands that any supply made under these terms is made by BMJ to the Submitting Author unless you are acting as an employee on behalf of your employer or a postgraduate student of an affiliated institution which is paying any applicable article publishing charge ("APC") for Open Access articles. Where the Submitting Author wishes to make the Work available on an Open Access basis (and intends to pay the relevant APC), the terms of reuse of such Open Access shall be governed by a Creative Commons licence – details of these licences and which [Creative Commons](#) licence will apply to this Work are set out in our licence referred to above.

Other than as permitted in any relevant BMJ Author's Self Archiving Policies, I confirm this Work has not been accepted for publication elsewhere, is not being considered for publication elsewhere and does not duplicate material already published. I confirm all authors consent to publication of this Work and authorise the granting of this licence.

1  
2  
3 **Factors Influencing the Safety of Coronary Computed Tomography Angiography – a Clinical Registry**  
4  
5 **Study**  
6  
7  
8  
9

10  
11 Florian Andre<sup>1,2</sup>, Philipp Fortner<sup>2</sup>, Mostafa Emami<sup>2</sup>, Sebastian Seitz<sup>2</sup>, Matthias Brado<sup>2</sup>, Friedemann  
12  
13 Gückel<sup>2</sup>, Roman Sokiranski<sup>2</sup>, André Sommer<sup>2</sup>, Norbert Frey<sup>1</sup>, Johannes Görich<sup>2</sup>, Sebastian J. Buss<sup>2</sup>  
14  
15

16 <sup>1</sup>University of Heidelberg, Department of Cardiology, Angiology and Pneumology  
17

18 <sup>2</sup>Radiology Center Sinsheim Eberbach Erbach Walldorf Heidelberg  
19  
20  
21  
22

23  
24 **Address of Correspondence:** Florian André  
25  
26 University of Heidelberg  
27  
28 Department of Cardiology, Angiology and Pneumology  
29  
30 Im Neuenheimer Feld 410  
31  
32 69120 Heidelberg  
33  
34 Germany  
35  
36

37  
38 **E-Mail:** florian.andre@med.uni-heidelberg.de  
39

40 **Phone:** + 49 6221 – 56 35908  
41

42 **Fax:** + 49 6221 – 56 5513  
43  
44  
45  
46  
47  
48  
49  
50  
51  
52  
53  
54  
55  
56  
57  
58  
59  
60

## Abstract

### Objectives

Since safety of coronary CT angiography (CTA) is of great importance, especially with regard to widening indications and increasing morbidity, aim of this study was to assess influencing factors.

### Methods

Patients undergoing coronary CTA in a third-generation dual-source CT in a radiological center were included in a clinical registry. Up to 20 mg metoprolol was administered intravenously to attain a heart rate  $\leq 65$ /min. Glyceryl trinitrate (GTN) was administered in doses of 0.8 mg and 0.4 mg. Blood pressure was measured before the administration and after the CTA.

### Results

Out of 5500 consecutive patients (3194 men, 62.3 (54.9-70.0) years), adverse events occurred in 68 patients (1.2%) with mild anaphylactoid reactions (0.4%), vasovagal symptoms (0.3%), and extravasation (0.3%) being most frequent. Anti-allergic drugs were given in 17 patients, atropine in 3 patients and volume in 1 patient. Drug administration resulted in a significant mean arterial pressure decline (96.0 (88.3-106.0) vs. 108.7 (99.7-117.3) mmHg;  $p < 0.001$ ). Patients, who suffered systolic blood pressure drops  $> 20$  mmHg or  $> 40$  mmHg, were older (66.5 (58.6-73.3) vs. 60.5 (53.6-68.3) years; 70.2 (63.3-76.5) vs. 62.1 (54.7-69.6) years), more often male (65.1% vs. 54.4%; 68.9% vs. 57.3%) and had higher Agatston score equivalents (83.0 (2.0-432.0) vs. 15.0 (0.0-172.0) and 163.0 (16.3-830.8) vs. 25.0 (0.0-220.0); all  $p < 0.001$ ). GTN dose reduction lowered the fraction of patients suffering from blood pressure drops  $> 20$  mmHg or  $> 40$  mmHg from 34.5% to 27.4% ( $p < 0.001$ ) and from 6.1% to 3.5% ( $p < 0.001$ ), respectively. The proportion of coronary segments with impaired image quality did not differ significantly.

## Conclusions

Coronary CTA with intravenous beta-blocker administration is a safe procedure in an outpatient setting as adverse events are rare and mostly mild. Reduced GTN doses can further improve safety by lowering the rate of significant blood pressure drops, which occurred especially in elderly men with increased plaque burden.

## Strengths and Limitations of this Study

- The study includes a large population of real-world patients and, thus, its results may be applicable in clinical routine.
- Adverse events, heart rate, and blood pressure characteristics were systematically recorded.
- Analyses were performed to identify patients at increased risk for adverse events.
- To our knowledge, this is the first study assessing the influence of GTN dosage on blood pressure and image quality in coronary CTA.
- Follow-up data on the effect of contrast agent administration, e.g., on renal function, were not available.

## Keywords

Coronary Artery Disease, Cardiovascular Imaging, Computed Tomography, Clinical Pharmacology, Cardiology

**Trial Registration:** NCT03815123

## Factors Influencing the Safety of Coronary Computed Tomography Angiography – a Clinical Registry Study

### Introduction

Over recent years, cardiac computed tomography (CT) has emerged as an essential diagnostic modality for the detection and assessment of coronary artery disease (CAD). Calcium scoring measures the calcified plaque burden without the need for contrast agent application adding incremental prognostic value to standard cardiovascular risk factors<sup>1,2</sup>. Coronary CT angiography (CTA) offers a simultaneous visualization of the entire coronary tree. In contrast to invasive coronary angiography, coronary CTA not only allows for the quantification of coronary artery stenosis but also the evaluation of plaque morphology including the detection of high-risk plaque features indicating vulnerable lesions<sup>3-5</sup>. In addition, cardiac CT renders the evaluation of the cardiac morphology and adjacent anatomic structures like the aorta and the lungs possible<sup>6</sup>. Its high sensitivity and negative predictive value allow for the reliable exclusion of obstructive CAD. Thus, cardiac CT and especially coronary CTA have been implemented in current guidelines for the diagnosis and management of CAD even being the first-line imaging modality in the current NICE guidelines<sup>7-10</sup>. As cardiac CT is increasingly used and modern CT scanners enable the assessment of significantly calcified vessels or even coronary artery stents, the fragility and morbidity of the patients undergoing coronary CTA increase<sup>11-13</sup>. Thus, the safety of cardiac CT examinations is of paramount importance, especially in an outpatient setting. Although CT angiography is generally regarded to be safe, real-world data on coronary CT angiography assessing the impact of glyceryl trinitrate and intravenous beta-blocker administration are scarce.

The aim of this study was to assess the safety of coronary CTA in a real-world outpatient population and to evaluate the benefit of an optimized CTA examination protocol with a reduced glyceryl trinitrate (GTN) dose.

## Methods

Patients were referred to coronary CTA by their attending physician and examinations were performed at a radiological center using a dual-source CT (DSCT) scanner of the third generation (SOMATOM Force, Siemens Healthcare, Erlangen, Germany). Subjects were enrolled in the Heidelberg Cardiac CT Registry and examinations, which were performed between May 2017 and April 2020, were included in this study. The workflow of the optimized coronary CTA examination protocol is given in Figure 1. Usually, an 18 G venous cannula was placed in the antecubital vein, but also 20 G cannulas were inserted into veins of the forearm or even the dorsum of the hand in individual cases. Patients were trained in breathing maneuvers as image acquisition was performed in inspiration breath-hold. Patients received up to 20 mg metoprolol tartrate (Lopressor, Recordati Pharma, Ulm, Germany) intravenously to achieve a heart rate of  $\leq 65$  /min. Glyceryl trinitrate (Nitrolingual, Pohl-Boskamp, Hohenlockstedt, Germany) was administered sublingually to improve the coronary artery visualization in standard doses of 0.8 mg (until April 2019) or 0.4 mg (from May 2019).

Of note, contraindications to the administrations of both drugs were excluded in advance. Patients with a known allergy to iodinated contrast agents were pretreated according to the current guidelines of the European Society of Urogenital Radiology<sup>14 15</sup>. Calcium scoring was performed before the contrast agent administration for the quantification of the coronary calcium burden and further optimization of the coronary CTA protocol. Between 40 ml and 80 ml prewarmed iomeprol with a concentration of 400 mg I/ml (Imeron 400, Bracco Imaging, Konstanz Germany) was administered at a flow rate between 4.5 and 5.5 ml/s depending on the respective protocol followed by a chaser of 30 ml isotonic saline at a flow rate of 5.0 ml/s. Axial or helical scan modes with automated attenuation-based tube potential selection and tube current (CARE Dose4D, Siemens Healthcare, Erlangen, Germany) were applied. The collimation was 96 x 0.6 mm and a slice acquisition of 192 x 0.6 mm using a z-flying focal was used. Advanced Modeled Iterative Reconstruction (ADMIRE) level 3 with dedicated cardiac kernels (usually Bv36 and Bv40) was applied for image reconstruction. The heart rate was recorded during the coronary CTA scan and blood pressure was measured before the drug



1  
2  
3 administration. In a subgroup, an additional blood pressure measurement was performed immediately  
4  
5 after the coronary CTA examination. The intravenous access was left for 30 minutes after contrast  
6  
7 agent administration as anaphylactoid reactions might occur delayed.  
8  
9

10 Image analysis was performed on a dedicated workstation (syngo.via, Siemens Healthcare, Erlangen,  
11  
12 Germany) by an experienced cardiologist and radiologist (>4000 cardiac CT examinations). The CT  
13  
14 examinations were reviewed visually before the patient was discharged to account for critical findings,  
15  
16 which might have an immediate therapeutic consequence, whereas the detailed analysis was  
17  
18 conducted afterwards. The results of the examination, as well as clinical data and adverse events, were  
19  
20 documented in a dedicated database. Anaphylactoid reactions were graded according to severity as  
21  
22 described before<sup>1617</sup>. Briefly, four classes with increasing severity were employed: I: pruritus or dermal  
23  
24 symptoms, II: abdominal, respiratory, or circulatory symptoms, III: more severe abdominal,  
25  
26 respiratory, or respiratory symptoms including cyanosis and shock, IV: respiratory or cardiac arrest.  
27  
28  
29

30  
31 The cardiac CT examinations were clinically indicated by the referring physician and approval for the  
32  
33 scientific data analysis was obtained from the ethics committee of the University of Heidelberg (S-  
34  
35 226/2016 and S-758/2018).  
36  
37

38  
39 The effect of the GTN dose on the proportion of coronary artery segments with impaired or non-  
40  
41 diagnostic image quality was assessed by two experienced readers in 100 randomly selected patients  
42  
43 with half of them receiving the reduced GTN dose.  
44  
45  
46  
47  
48

#### 49 Patient and Public Involvement

50  
51 Patients, who were prospectively enrolled in the clinical registry, were informed about the general  
52  
53 aims and research questions. Since the cardiac CT examinations were clinically indicated, patients  
54  
55 could not be involved in the recruitment of the study population or in the conduct of the examinations.  
56  
57  
58 The results of this study will be implemented in clinical routine and, thus, be beneficial to future  
59  
60 patients.

## Statistics

Continuous data are uniformly given as a median and interquartile range as part of the data showed a non-parametric distribution. Normal distribution was assessed using the D'Agostino-Pearson test. Categorical data are given as numbers and proportions. The Mann-Whitney test was used for the comparison of two groups, the Wilcoxon test for paired samples, and the Kruskal-Wallis test with a posthoc analysis (Conover) for the analysis of several groups as appropriate. The Fisher's exact test was employed for the comparison of categorical data. Multivariate logistic regression analysis was used to model the effect of independent variables on a dichotomous characteristic of interest. In the case of missing values, the number of subjects included in the respective analysis is given at first mention. A p-value <0.05 was regarded as statistically significant. Analyses were conducted using dedicated statistical software (MedCalc Statistical Software version 19, MedCalc Software, Belgium).

## Results

Coronary CTA examinations of 5500 consecutive patients (3194 men, 2306 women) with a median age of 62.3 (54.9-70.0) years were included in the final study population. Of note, safe venous access could not be established in 7 additional patients and another 2 patients aborted the examination after the calcium scoring scan due to a panic attack and severe claustrophobia. Male were significantly younger than female subjects (61.2 (53.9-69.3) years vs. 63.9 (56.5-71.1) years;  $p < 0.001$ ).

Adverse events occurred in 68 patients (1.2 %) with mild anaphylactoid reactions, vasovagal symptoms, and extravasation being most frequent. Of note, only mild forms of anaphylactoid reactions occurred in our study population. Another 36 patients (0.7 %) suffered from severe nausea which abated spontaneously within a few minutes in all subjects. An overview of all adverse events is given in Table 1 and Figure 2. Out of 24 patients (0.4 %) with anaphylactic reactions, 17 received a medication. Atropine was administered in 3 patients with symptomatic bradycardia and isotonic saline was administered in one patient with vasovagal symptoms. One patient was referred to the chest pain

1  
2  
3 unit due to critical coronary artery stenoses in combination with bradycardia after beta-blocker  
4 administration. Two patients were hospitalized due to unstable CAD and another one due to  
5 unexpected pulmonary embolism. In 5 of 16 cases of extravasation, only saline was injected  
6 extravascularly. Of note, all patients could be treated conservatively. Patients with adverse events  
7 were significantly younger (57.3 (50.8-61.6) years vs. 62.4 (55.0-70.1) years;  $p < 0.001$ ), which was  
8 mainly driven by the lower age of the subjects suffering from mild anaphylactoid reactions and  
9 vasovagal symptoms ( $p < 0.05$ ). The rate of adverse events did not differ significantly between the male  
10 and female patients ( $p = n.s.$ ).

11  
12 The administration of beta-blocker and GTN resulted in a significant decline of the systolic and mean  
13 arterial pressure (134.0 (122.0-150.0) mmHg vs. 150.0 (136.0-165.0) mmHg and 96.0 (88.3-106.0)  
14 mmHg vs. 108.7 (99.7-117.3) mmHg; both  $p < 0.001$ ,  $n = 5185$ ). Median heart rate was 62.0 (56.0-68.0)  
15 /min ( $n = 5324$ ) with men showing a little but significant lower frequency (61.0 (56.0-67.0) /min vs. 63.0  
16 (68.0-69.0) /min;  $p < 0.001$ ) during the image acquisition. Patients suffering from systolic blood pressure  
17 drops of more than 20 mmHg and more than 40 mmHg were significantly older (66.5. (58.6-73.3) years  
18 vs. 60.5 (53.6-68.3) years and 70.2 (63.3-76.5) years vs. 62.1 (54.7-69.6) years; both  $p < 0.001$ ), were  
19 more often male (65.1 % vs. 54.4 %;  $p < 0.001$  and 68.9 % vs. 57.3 %; both  $p < 0.001$ ) and had a higher  
20 Agatston score equivalent (83.0 (2.0-432.0) vs. 15.0 (0.0-172.0) and 163.0 (16.3-830.8) vs. 25.0 (0.0-  
21 220.0), both  $p < 0.001$ ,  $n = 5184$ ). Age, sex and the Agatston score equivalent were significant predictors  
22 for systolic blood pressure drops of more than 40 mmHg in the multivariate regression analysis,  
23 whereas age and sex but not the Agatston score equivalent reached statistical significance for systolic  
24 blood pressure drops of more than 20 mmHg ( $n = 5184$ ).

25  
26 The reduction of the standard GTN dose from 0.8 mg to 0.4 mg ( $n = 3688$ ;  $n = 1812$ ) resulted in small but  
27 significant decreases of the systolic blood pressure drop (15.0 (6.0-25.0) mmHg vs. 12.0 (3.0-21.5)  
28 mmHg) as well as the mean arterial pressure drop (12.3 (5.7-18.7) mmHg vs. 9.7 (3.7-16.3) mmHg;  $n =$   
29 5185; both  $p < 0.001$ ). Of note, the proportions of patients suffering a drop of the systolic blood  
30 pressure of more than 20 mmHg (34.5 % vs. 27.4 %;  $p < 0.001$ ) as well as more than 40 mmHg (6.1 % vs

1  
2  
3 3.5 %;  $p < 0.001$ ) declined significantly with the reduction of the GTN dose (Figure 3). Age (62.6. (55.1-  
4 70.4) years vs. 62.2 (54.9-69.6 years),  $n=5185$ ), sex (57.3 % men vs. 59.1 % men,  $n=5185$ ) and the  
5  
6 Agatston score equivalents (30.0 (0.0-261.0) vs. 25.0 (0.0-219.0)  $n=5184$ ) did not differ significantly  
7  
8  
9 between the GTN groups included in the blood pressure analysis (all  $p=n.s.$ ).

10  
11  
12 The proportion of coronary artery segments with impaired or non-diagnostic image quality did not  
13  
14 differ significantly between the GTN dose groups (both  $p=n.s.$ ).

## 20 21 Discussion

22  
23 Coronary CTA is increasingly used as the first-line diagnostic modality for coronary artery disease  
24  
25 replacing more and more diagnostic invasive coronary angiography for the primary assessment of  
26  
27 coronary anatomy. Consequently, the fragility and morbidity of the patients referred to coronary CTA  
28  
29 increase. Periprocedural safety is of great importance in clinical routine and especially in outpatient  
30  
31 settings. Prior data indicate that adverse reactions may occur more frequently in outpatient than  
32  
33 inpatient settings<sup>18</sup> and, additionally, the ability to address emergencies may be limited in some  
34  
35 facilities. Thus, we assessed the safety of coronary CTA in a large real-world population and evaluated  
36  
37 an optimized coronary CTA examination protocol. The key findings of our studies were as follows. 1)  
38  
39 Adverse events as anaphylactoid reactions and extravasations are rare and mostly mild. 2) The  
40  
41 intravenous administration of beta-blockers in combination with GTN can be regarded as safe when  
42  
43 the dose is thoroughly adapted to the individual patient. 3) The fraction of patients suffering from  
44  
45 significant blood pressure drops is increased especially in elderly men with increased plaque burden.  
46  
47 4) The reduction of the GTN dose reduces the rate of significant blood pressure drops without  
48  
49 impairing the diagnostic image quality.

50  
51  
52 In the study population, anaphylactoid reactions were the most common adverse event with 0.4 % of  
53  
54 cases of whom about two-thirds received medical treatment. Of note, only mild reactions occurred in  
55  
56 our study population and none of the patients required hospitalization. About 0.7 % of the patients  
57  
58  
59  
60

1  
2  
3 reported transient nausea with none of them needing any medication which is in line with previously  
4 published studies <sup>19-21</sup>. Adverse reactions occurred more often in younger patients which is in  
5 agreement with a study by Gomi et al showing a higher incidence of adverse reactions in patients aged  
6  
7  
8  
9  
10 59 years or less compared with older ones <sup>20</sup>.

11  
12 While the high degree of safety of the intravenous administration of current contrast agents was  
13 shown in several studies <sup>22 23</sup>, the use of GTN and beta-blockers in cardiac patients requires an  
14 individual clinical assessment, especially in outpatient settings. Current guidelines approve the oral,  
15 intravenous, or both routes of beta-blocker administration, while an oral premedication followed by  
16 supplemental intravenous application, when necessary, is given as the most common approach <sup>24</sup>. The  
17 intravenous administration results in an immediate reduction of the heart rate and, thus, allows for a  
18 precise titration. In a retrospective study of 560 consecutive patients, the intravenous administration  
19 of atenolol resulted in a better heart rate reduction as well as in a faster preparation than the oral  
20 intake of metoprolol <sup>25</sup>. Although patients with atrial fibrillations were not excluded from our study,  
21 the median heart rate after beta-blocker administration was 62.0 (56.0-68.0) /min and, thus, suitable  
22 for coronary CTA using a third-generation DSCT scanner. Yet, safety data on the sole use of intravenous  
23 beta-blockers for rapid heart rate control is limited <sup>25,26</sup>. In our study population, the fraction of patients  
24 with symptomatic bradycardia was approximately 0.1 % and medical intervention was needed in less  
25 than half of the cases. Thus, we consider the intravenous administration of metoprolol immediately  
26 before CT image acquisition to be safe, when individually adapted to the patient.  
27  
28  
29  
30  
31  
32  
33  
34  
35  
36  
37  
38  
39  
40  
41  
42  
43  
44  
45

46  
47 GTN causes vasodilation, which can result in a drop in blood pressure and a reactive increase in the  
48 heart rate. While some protocols recommend the application of GTN immediately before the coronary  
49 CTA due to its short half-life of 2.5-4.4 min <sup>27</sup>, we recommend its administration before the beta-  
50 blocker application for two reasons. First, the potential reactive heart rate increase can be  
51 counteracted by metoprolol administration adequately. Second, some patients may show an excessive  
52 blood pressure drop and may, therefore, need the reactive heart rate increase to sustain a sufficient  
53 mean arterial pressure, which would be impeded by prior administered beta-blockers. This  
54  
55  
56  
57  
58  
59  
60

1  
2  
3 compensatory mechanism may be of importance especially in multimorbid patients, who often already  
4 suffer from a reduced heart rate adaptation. Of note, in our study, systolic blood pressure drops of  
5 more than 20 mmHg or even more than 40 mmHg occurred prevalently in elderly men with a high  
6 plaque burden indicated by the Agatston score equivalent.  
7  
8  
9

10  
11  
12 In order to further improve the safety of coronary CTA examinations especially in fragile patients, we  
13 assessed the reduction of the standard GTN dose from 0.8 mg to 0.4 mg. This led to a reduction of the  
14 systolic as well as the mean arterial pressure drops of approximately 3 mmHg, respectively. Although  
15 being statistically highly significant, the clinical relevance of this reduction may seem to be low.  
16  
17 However, the fraction of patients showing drops of more than 20 mmHg as well as more than 40 mmHg  
18 decreased significantly from 34.5 % to 27.4 % and 6.1 % to 3.5 %, respectively. Of note, the image  
19 quality of the coronary CTA was not impaired, being possibly due to the fact that the time of the  
20 maximal drug level of sublingually administered GTN ranges between 2 and 10 min and the half-life of  
21 its vasoactive metabolites is even longer covering the time of the coronary CTA <sup>28</sup>. Thus, the reduction  
22 of the GTN dose may improve patient safety without impairing diagnostic accuracy.  
23  
24  
25  
26  
27  
28  
29  
30  
31  
32  
33  
34  
35

36 As the data analysis was conducted retrospectively, prospective trials are needed to confirm the  
37 improvement in patient safety by the optimized coronary CTA examination protocol. The number of  
38 adverse events was low hampering further statistical analyses, especially of subgroups. Since all  
39 patients were examined in an outpatient setting, follow-up data on late reactions after contrast agent  
40 administration as well as on renal function were not available. Of note, the risk of a contrast-induced  
41 acute kidney injury was very low as patients with an eGFR <45 ml/1.73m<sup>2</sup>/min were not examined  
42 routinely in this study <sup>29 30</sup>.  
43  
44  
45  
46  
47  
48  
49  
50  
51

52 The rate of major complications in diagnostic cardiac catheterization has been reported to be low (0.1-  
53 0.3 %) whereas the overall complication rate is approximately 0.8-1.4 % <sup>31-33</sup>. Of note, the definitions  
54 of complication and adverse events can differ substantially between studies on cardiac catheterization  
55 and cardiac CT with the latter using a more comprehensive approach even including mild forms of  
56  
57  
58  
59  
60

1  
2  
3 adverse events as transient nausea. Aside from immediate periprocedural adverse events, acute  
4  
5 kidney injury is more common after cardiac catheterization than after cardiac CT which is due to the  
6  
7 different modes (intraarterial vs. intravenous) of contrast agent application <sup>34</sup>. Because of its lower  
8  
9 invasiveness and the generally lower incidence and severity of adverse events, coronary CTA is the  
10  
11 safer modality for CAD diagnostics unless in emergencies and in unstable patients when immediate  
12  
13 treatment is necessary.  
14  
15  
16  
17  
18  
19

## 20 **Conclusions**

21  
22  
23 Coronary CTA with GTN and intravenous beta-blocker administration allows for a safe assessment of  
24  
25 CAD in an outpatient setting showing a low rate of mostly mild adverse events. The use of an optimized  
26  
27 coronary CTA examination protocol with a reduced GTN dose results in a lower fraction of patients  
28  
29 with significant blood pressure drops and, thus, may further improve safety, especially in fragile  
30  
31 patients.  
32  
33  
34  
35  
36  
37  
38  
39  
40  
41  
42  
43  
44  
45  
46  
47  
48  
49  
50  
51  
52  
53  
54  
55  
56  
57  
58  
59  
60

### **Data Availability Statement**

The data sets analyzed in this study are not publicly available due data protection regulation. They are available on reasonable request from the corresponding author.

### **Funding Statement**

This work was supported by a research grant from Siemens Healthineers.

### **Competing Interests Statement**

The Radiology Center received a research grant from Siemens Healthineers. The authors declare, that there are no relationships that could be construed as conflict of interests.

### **Contributorship Statement**

FA and SJB designed the study and performed the data analysis. PF, SJB, JG, MB, FG, RS and AS contributed to the data acquisition and ME and SS collected and administered the data. JG, AS and NF gave administrative support. All authors contributed to writing and editing of the manuscript and approved the final version.



## References

1. Detrano R, Guerci AD, Carr JJ, et al. Coronary calcium as a predictor of coronary events in four racial or ethnic groups. *The New England journal of medicine* 2008;358(13):1336-45. doi: 10.1056/NEJMoa072100 [published Online First: 2008/03/28]
2. Yeboah J, McClelland RL, Polonsky TS, et al. Comparison of novel risk markers for improvement in cardiovascular risk assessment in intermediate-risk individuals. *JAMA* 2012;308(8):788-95. doi: 10.1001/jama.2012.9624 [published Online First: 2012/08/23]
3. Williams MC, Moss AJ, Dweck M, et al. Coronary Artery Plaque Characteristics Associated With Adverse Outcomes in the SCOT-HEART Study. *Journal of the American College of Cardiology* 2019;73(3):291-301. doi: 10.1016/j.jacc.2018.10.066 [published Online First: 2019/01/27]
4. Lee JM, Choi KH, Koo BK, et al. Prognostic Implications of Plaque Characteristics and Stenosis Severity in Patients With Coronary Artery Disease. *Journal of the American College of Cardiology* 2019;73(19):2413-24. doi: 10.1016/j.jacc.2019.02.060 [published Online First: 2019/05/18]
5. Williams MC, Kwiecinski J, Doris M, et al. Low-Attenuation Noncalcified Plaque on Coronary Computed Tomography Angiography Predicts Myocardial Infarction: Results From the Multicenter SCOT-HEART Trial (Scottish Computed Tomography of the HEART). *Circulation* 2020 doi: 10.1161/CIRCULATIONAHA.119.044720 [published Online First: 2020/03/17]
6. Kay FU, Canan A, Abbara S. Common Incidental Findings on Cardiac CT: a Systematic Review. *Current Cardiovascular Imaging Reports* 2019;12(6) doi: 10.1007/s12410-019-9494-4
7. Knuuti J, Wijns W, Saraste A, et al. 2019 ESC Guidelines for the diagnosis and management of chronic coronary syndromes. *Eur Heart J* 2020;41(3):407-77. doi: 10.1093/eurheartj/ehz425 [published Online First: 2019/09/11]
8. Excellence NIfHaC. Recent-onset chest pain of suspected cardiac origin: assessment and diagnosis (Clinical Guideline 95). Updated November 2016.: National Institute for Health and Care Excellence (NICE); 2010 [Available from: <https://www.nice.org.uk/guidance/cg95> accessed March 30 th 2020.

- 1  
2  
3 9. Moss AJ, Williams MC, Newby DE, et al. The Updated NICE Guidelines: Cardiac CT as the First-Line  
4  
5 Test for Coronary Artery Disease. *Curr Cardiovasc Imaging Rep* 2017;10(5):15. doi:  
6  
7 10.1007/s12410-017-9412-6 [published Online First: 2017/04/28]  
8  
9
10. Fihn SD, Gardin JM, Abrams J, et al. 2012 ACCF/AHA/ACP/AATS/PCNA/SCAI/STS Guideline for the  
11  
12 Diagnosis and Management of Patients With Stable Ischemic Heart Disease. *Journal of the*  
13  
14 *American College of Cardiology* 2012;60(24):e44-e164. doi: 10.1016/j.jacc.2012.07.013  
15
- 16 11. Narula J, Chandrashekar Y, Ahmadi A, et al. SCCT 2021 Expert Consensus Document on Coronary  
17  
18 Computed Tomographic Angiography: A Report of the Society of Cardiovascular Computed  
19  
20 Tomography. *J Cardiovasc Comput Tomogr* 2020 doi: 10.1016/j.jcct.2020.11.001 [published  
21  
22 Online First: 2020/12/12]  
23  
24
- 25 12. Giusca S, Schütz M, Kronbach F, et al. Coronary Computer Tomography Angiography in 2021—  
26  
27 Acquisition Protocols, Tips and Tricks and Heading beyond the Possible. *Diagnostics* 2021;11(6)  
28  
29 doi: 10.3390/diagnostics11061072  
30  
31
- 32 13. Ochs MM, Siepen FAD, Fritz T, et al. Limits of the possible: diagnostic image quality in coronary  
33  
34 angiography with third-generation dual-source CT. *Clin Res Cardiol* 2017;106(7):485-92. doi:  
35  
36 10.1007/s00392-017-1077-2 [published Online First: 2017/02/09]  
37  
38
- 39 14. Radiology ESoU. ESUR Guidelines on Contrast Agents 10.02018.  
40
- 41 15. Radiology ESoU. ESUR Guidelines on Contrast Media 9.02014.  
42
- 43 16. Ring J, Messmer K. Incidence and severity of anaphylactoid reactions to colloid volume substitutes.  
44  
45 *Lancet* 1977;1(8009):466-9. doi: 10.1016/s0140-6736(77)91953-5 [published Online First:  
46  
47 1977/02/26]  
48  
49
- 50 17. Ring J, Beyer K, Biedermann T, et al. Guideline for acute therapy and management of anaphylaxis:  
51  
52 S2 Guideline of the German Society for Allergology and Clinical Immunology (DGAKI), the  
53  
54 Association of German Allergologists (AeDA), the Society of Pediatric Allergy and  
55  
56 Environmental Medicine (GPA), the German Academy of Allergology and Environmental  
57  
58 Medicine (DAAU), the German Professional Association of Pediatricians (BVKJ), the Austrian  
59  
60

- 1  
2  
3 Society for Allergy and Immunology (OGAI), the Swiss Society for Allergy and Immunology  
4  
5 (SGAI), the German Society of Anaesthesiology and Intensive Care Medicine (DGAI), the  
6  
7 German Society of Pharmacology (DGP), the German Society for Psychosomatic Medicine  
8  
9 (DGPM), the German Working Group of Anaphylaxis Training and Education (AGATE) and the  
10  
11 patient organization German Allergy and Asthma Association (DAAB). *Allergo J Int*  
12  
13 2014;23(3):96-112. doi: 10.1007/s40629-014-0009-1 [published Online First: 2014/01/01]  
14  
15
- 16 18. Dean KE, Starikov A, Giambone A, et al. Adverse reactions to intravenous contrast media: an  
17  
18 unexpected discrepancy between inpatient and outpatient cohorts. *Clin Imaging*  
19  
20 2015;39(5):863-5. doi: 10.1016/j.clinimag.2015.04.014 [published Online First: 2015/07/15]  
21  
22
- 23 19. Kim YS, Yoon SH, Choi YH, et al. Nausea and vomiting after exposure to non-ionic contrast media:  
24  
25 incidence and risk factors focusing on preparatory fasting. *Br J Radiol*  
26  
27 2018;91(1087):20180107. doi: 10.1259/bjr.20180107 [published Online First: 2018/04/26]  
28  
29
- 30 20. Gomi T, Nagamoto M, Hasegawa M, et al. Are there any differences in acute adverse reactions  
31  
32 among five low-osmolar non-ionic iodinated contrast media? *Eur Radiol* 2010;20(7):1631-5.  
33  
34 doi: 10.1007/s00330-009-1698-6 [published Online First: 2009/12/25]  
35  
36
- 37 21. Vijayalakshmi K, Kunadian B, Wright RA, et al. A prospective randomised controlled trial to  
38  
39 determine the early and late reactions after the use of iopamidol 340 (Niopam) and iomeprol  
40  
41 350 (Iomeron) in cardiac catheterisation. *Eur J Radiol* 2007;61(2):342-50. doi:  
42  
43 10.1016/j.ejrad.2006.09.013 [published Online First: 2006/11/15]  
44  
45
- 46 22. Andreucci M, Solomon R, Tasanarong A. Side effects of radiographic contrast media: pathogenesis,  
47  
48 risk factors, and prevention. *Biomed Res Int* 2014;2014:741018. doi: 10.1155/2014/741018  
49  
50 [published Online First: 2014/06/05]  
51
- 52 23. Lu MT, Douglas PS, Udelson JE, et al. Safety of coronary CT angiography and functional testing for  
53  
54 stable chest pain in the PROMISE trial: A randomized comparison of test complications,  
55  
56 incidental findings, and radiation dose. *J Cardiovasc Comput Tomogr* 2017;11(5):373-82. doi:  
57  
58 10.1016/j.jcct.2017.08.005 [published Online First: 2017/08/26]  
59  
60

- 1  
2  
3 24. Abbara S, Blanke P, Maroules CD, et al. SCCT guidelines for the performance and acquisition of  
4  
5 coronary computed tomographic angiography: A report of the society of Cardiovascular  
6  
7 Computed Tomography Guidelines Committee: Endorsed by the North American Society for  
8  
9 Cardiovascular Imaging (NASCI). *J Cardiovasc Comput Tomogr* 2016;10(6):435-49. doi:  
10  
11 10.1016/j.jcct.2016.10.002 [published Online First: 2016/10/27]  
12  
13
- 14 25. Maffei E, Palumbo AA, Martini C, et al. "In-house" pharmacological management for computed  
15  
16 tomography coronary angiography: heart rate reduction, timing and safety of different drugs  
17  
18 used during patient preparation. *Eur Radiol* 2009;19(12):2931-40. doi: 10.1007/s00330-009-  
19  
20 1509-0 [published Online First: 2009/07/15]  
21  
22
- 23 26. Kassamali RH, Kim DH, Patel H, et al. Safety of an i.v. beta-adrenergic blockade protocol for heart  
24  
25 rate optimization before coronary CT angiography. *AJR American journal of roentgenology*  
26  
27 2014;203(4):759-62. doi: 10.2214/AJR.13.11492 [published Online First: 2014/09/24]  
28  
29
- 30 27. Bell GW, Edwardes M, Dunning AM, et al. Periprocedural safety of 64-detector row coronary  
31  
32 computed tomographic angiography: results from the prospective multicenter ACCURACY  
33  
34 trial. *J Cardiovasc Comput Tomogr* 2010;4(6):375-80. doi: 10.1016/j.jcct.2010.08.003  
35  
36 [published Online First: 2010/10/30]  
37  
38
- 39 28. Hashimoto S, Kobayashi A. Clinical pharmacokinetics and pharmacodynamics of glyceryl trinitrate  
40  
41 and its metabolites. *Clin Pharmacokinet* 2003;42(3):205-21. doi: 10.2165/00003088-  
42  
43 200342030-00001 [published Online First: 2003/02/27]  
44  
45
- 46 29. Solomon R. Contrast-induced acute kidney injury: is there a risk after intravenous contrast? *Clin J*  
47  
48 *Am Soc Nephrol* 2008;3(5):1242-3. doi: 10.2215/CJN.03470708 [published Online First:  
49  
50 2008/08/15]  
51
- 52 30. Weisbord SD, Mor MK, Resnick AL, et al. Incidence and outcomes of contrast-induced AKI following  
53  
54 computed tomography. *Clin J Am Soc Nephrol* 2008;3(5):1274-81. doi: 10.2215/CJN.01260308  
55  
56 [published Online First: 2008/05/09]  
57  
58  
59  
60

- 1  
2  
3 31. Al-Hijji MA, Lennon RJ, Gulati R, et al. Safety and Risk of Major Complications With Diagnostic  
4 Cardiac Catheterization. *Circ Cardiovasc Interv* 2019;12(7):e007791. doi:  
5 10.1161/CIRCINTERVENTIONS.119.007791 [published Online First: 2019/07/10]  
6  
7  
8  
9  
10 32. Ammann P, Brunner-La Rocca HP, Angehrn W, et al. Procedural complications following diagnostic  
11 coronary angiography are related to the operator's experience and the catheter size. *Catheter*  
12 *Cardiovasc Interv* 2003;59(1):13-8. doi: 10.1002/ccd.10489 [published Online First:  
13 2003/04/30]  
14  
15  
16  
17  
18 33. Dehmer GJ, Weaver D, Roe MT, et al. A contemporary view of diagnostic cardiac catheterization  
19 and percutaneous coronary intervention in the United States: a report from the CathPCI  
20 Registry of the National Cardiovascular Data Registry, 2010 through June 2011. *Journal of the*  
21 *American College of Cardiology* 2012;60(20):2017-31. doi: 10.1016/j.jacc.2012.08.966  
22 [published Online First: 2012/10/23]  
23  
24  
25  
26  
27  
28  
29 34. Schonenberger E, Martus P, Bossert M, et al. Kidney Injury after Intravenous versus Intra-arterial  
30 Contrast Agent in Patients Suspected of Having Coronary Artery Disease: A Randomized Trial.  
31 *Radiology* 2019;292(3):664-72. doi: 10.1148/radiol.2019182220 [published Online First:  
32 2019/07/03]  
33  
34  
35  
36  
37  
38  
39  
40  
41  
42  
43  
44  
45  
46  
47  
48  
49  
50  
51  
52  
53  
54  
55  
56  
57  
58  
59  
60

1  
2  
3 **Tables**  
4  
5

6 **Table 1: Adverse events – Frequency and patient characteristics**  
7

8  
9  
10  
11  
12  
13  
14  
15  
16  
17  
18  
19  
20  
21  
22  
23  
24  
25  
26  
27  
28  
29  
30  
31  
32  
33  
34  
35  
36  
37  
38  
39  
40  
41  
42  
43  
44  
45  
46  
47  
48  
49  
50  
51  
52  
53  
54  
55  
56  
57  
58  
59  
60

|                                 | n  | fraction | male | female | age [years]      |
|---------------------------------|----|----------|------|--------|------------------|
| Anaphylactoid Reaction I°/II°   | 24 | 0.4%     | 12   | 12     | 52.5 (48.0-59.5) |
| Anaphylactoid Reaction III°/IV° | 0  | 0.0 %    | 0    | 0      |                  |
| Vasovagal Symptoms              | 17 | 0.3%     | 11   | 6      | 56.0 (48.7-61.6) |
| Extravasation                   | 16 | 0.3%     | 8    | 8      | 60.5 (53.4-67.1) |
| Symptomatic bradycardia         | 7  | 0.1%     | 7    | 0      | 59.1 (56.7-67.0) |
| Supraventricular tachycardia    | 1  | 0.02%    | 1    | 0      | 58.1             |
| Dizziness/Presyncope            | 2  | 0.04%    | 0    | 2      | 53.6 (51.5-55.6) |
| Arterial Hypertension           | 1  | 0.02%    | 0    | 1      | 78.9             |
| Nausea                          | 36 | 0.7%     | 20   | 16     | 59.8 (52.9-65.7) |

## Figures Captions

### Figure 1: Optimized coronary CTA examination protocol

i.v.: intravenously, G: gauge, SBP: systolic blood pressure, s.l.: sublingually

Common contraindications to metoprolol administration: hemodynamic instability, SBP < 90 mmHg, heart rate <50 /min, sick-sinus-syndrome, atrioventricular blockage II°/III°, severe asthma, intake of non-dihydropyridine calcium channel blockers, allergy to beta-blockers

### Figure 2: Number of adverse events

- a) The rate of all complications inclusive of transient nausea was low with 104 of 5500 patients (1.9 %).
- b) Adverse events aside from nausea occurred in only 68 patients (1.2 %) being mostly mild.

### Figure 3: Rate of significant blood pressure drops depending on glyceryl trinitrate dose

The reduction of the standard GTN dose from 0.8 mg to 0.4 mg resulted in significantly lower proportions of patients suffering a drop of the systolic blood pressure >20 mmHg as well as >40 mmHg.

\*p<0.001

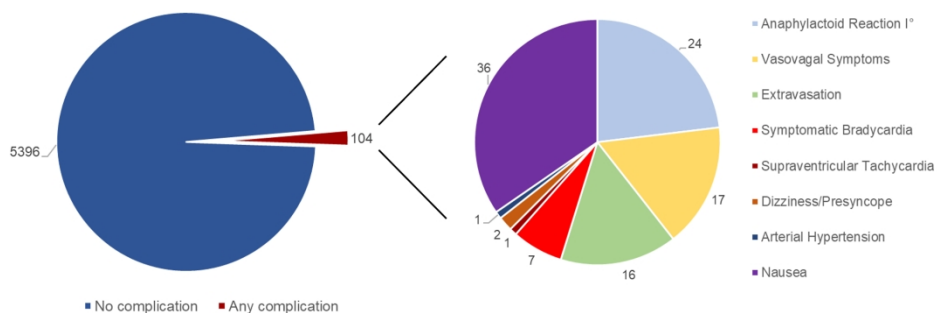

Figure 2: Number of adverse events

- a) The rate of all complications inclusive of transient nausea was low with 104 of 5500 patients (1.9 %).
- b) Adverse events aside from nausea occurred in only 68 patients (1.2 %) being mostly mild.

99x38mm (600 x 600 DPI)



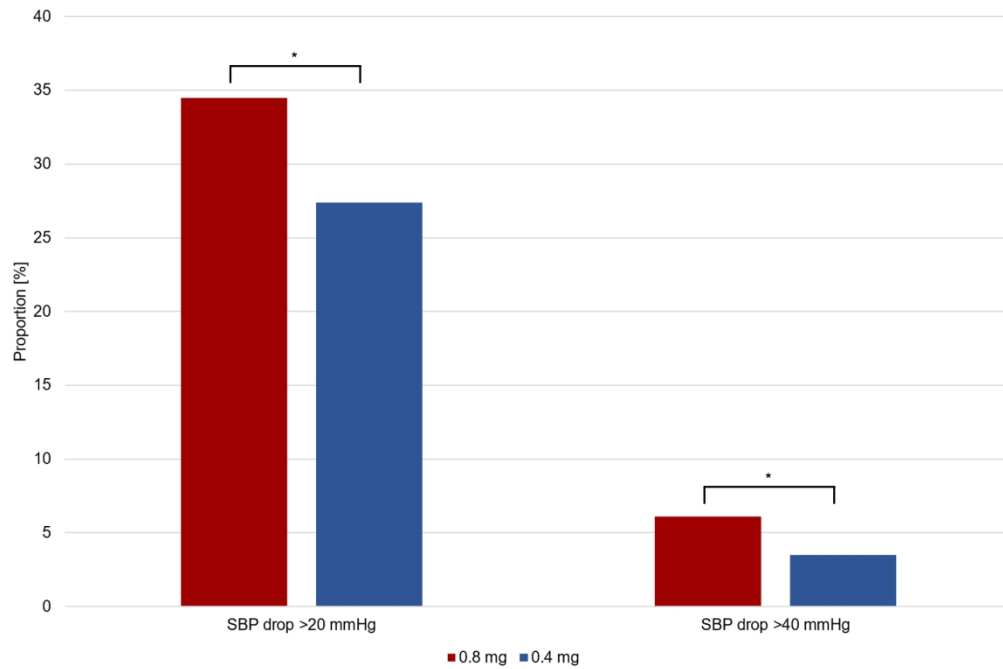

Figure 3: Rate of significant blood pressure drops depending on glyceryl trinitrate dose  
The reduction of the standard GTN dose from 0.8 mg to 0.4 mg resulted in significantly lower proportions of patients suffering a drop of the systolic blood pressure >20 mmHg as well as >40 mmHg. \*p<0.001

712x467mm (72 x 72 DPI)

# BMJ Open

## Factors Influencing the Safety of Outpatient Coronary Computed Tomography Angiography – a Clinical Registry Study

|                                 |                                                                                                                                                                                                                                                                                                                                                                                                                                                                                                                                                                                                                                                                                                                                                                                                                                                                                                                                                                                                                                                                               |
|---------------------------------|-------------------------------------------------------------------------------------------------------------------------------------------------------------------------------------------------------------------------------------------------------------------------------------------------------------------------------------------------------------------------------------------------------------------------------------------------------------------------------------------------------------------------------------------------------------------------------------------------------------------------------------------------------------------------------------------------------------------------------------------------------------------------------------------------------------------------------------------------------------------------------------------------------------------------------------------------------------------------------------------------------------------------------------------------------------------------------|
| Journal:                        | <i>BMJ Open</i>                                                                                                                                                                                                                                                                                                                                                                                                                                                                                                                                                                                                                                                                                                                                                                                                                                                                                                                                                                                                                                                               |
| Manuscript ID                   | bmjopen-2021-058304.R1                                                                                                                                                                                                                                                                                                                                                                                                                                                                                                                                                                                                                                                                                                                                                                                                                                                                                                                                                                                                                                                        |
| Article Type:                   | Original research                                                                                                                                                                                                                                                                                                                                                                                                                                                                                                                                                                                                                                                                                                                                                                                                                                                                                                                                                                                                                                                             |
| Date Submitted by the Author:   | 16-Apr-2022                                                                                                                                                                                                                                                                                                                                                                                                                                                                                                                                                                                                                                                                                                                                                                                                                                                                                                                                                                                                                                                                   |
| Complete List of Authors:       | <p>Andre, Florian; Heidelberg University, Department of Cardiology, Angiology and Pneumology; Radiology Center Sinsheim Eberbach Erbach Walldorf Heidelberg</p> <p>Fortner, Philipp; Radiology Center Sinsheim Eberbach Erbach Walldorf Heidelberg</p> <p>Emami, Mostafa; Radiology Center Sinsheim Eberbach Erbach Walldorf Heidelberg</p> <p>Seitz, Sebastian; Radiology Center Sinsheim Eberbach Erbach Walldorf Heidelberg</p> <p>Brado, Matthias; Radiology Center Sinsheim Eberbach Erbach Walldorf Heidelberg</p> <p>Gückel, Friedemann; Radiology Center Sinsheim Eberbach Erbach Walldorf Heidelberg</p> <p>Sokiranski, Roman; Radiology Center Sinsheim Eberbach Erbach Walldorf Heidelberg</p> <p>Sommer, André; Radiology Center Sinsheim Eberbach Erbach Walldorf Heidelberg</p> <p>Frey, Norbert; Heidelberg University, Department of Cardiology, Angiology and Pneumology</p> <p>Görich, Johannes; Radiology Center Sinsheim Eberbach Erbach Walldorf Heidelberg</p> <p>Buss, Sebastian J.; Radiology Center Sinsheim Eberbach Erbach Walldorf Heidelberg</p> |
| <b>Primary Subject Heading</b>: | Radiology and imaging                                                                                                                                                                                                                                                                                                                                                                                                                                                                                                                                                                                                                                                                                                                                                                                                                                                                                                                                                                                                                                                         |
| Secondary Subject Heading:      | Cardiovascular medicine, Pharmacology and therapeutics                                                                                                                                                                                                                                                                                                                                                                                                                                                                                                                                                                                                                                                                                                                                                                                                                                                                                                                                                                                                                        |
| Keywords:                       | Coronary heart disease < RADIOLOGY, Cardiovascular imaging < RADIOLOGY & IMAGING, Computed tomography < RADIOLOGY & IMAGING, Cardiology < INTERNAL MEDICINE, Adverse events < THERAPEUTICS, CLINICAL PHARMACOLOGY                                                                                                                                                                                                                                                                                                                                                                                                                                                                                                                                                                                                                                                                                                                                                                                                                                                             |
|                                 |                                                                                                                                                                                                                                                                                                                                                                                                                                                                                                                                                                                                                                                                                                                                                                                                                                                                                                                                                                                                                                                                               |

1  
2  
3  
4  
5  
6  
7  
8  
9  
10  
11  
12  
13  
14  
15  
16  
17  
18  
19  
20  
21  
22  
23  
24  
25  
26  
27  
28  
29  
30  
31  
32  
33  
34  
35  
36  
37  
38  
39  
40  
41  
42  
43  
44  
45  
46  
47  
48  
49  
50  
51  
52  
53  
54  
55  
56  
57  
58  
59  
60

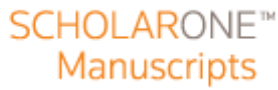

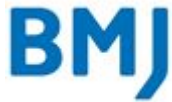

I, the Submitting Author has the right to grant and does grant on behalf of all authors of the Work (as defined in the below author licence), an exclusive licence and/or a non-exclusive licence for contributions from authors who are: i) UK Crown employees; ii) where BMJ has agreed a CC-BY licence shall apply, and/or iii) in accordance with the terms applicable for US Federal Government officers or employees acting as part of their official duties; on a worldwide, perpetual, irrevocable, royalty-free basis to BMJ Publishing Group Ltd ("BMJ") its licensees and where the relevant Journal is co-owned by BMJ to the co-owners of the Journal, to publish the Work in this journal and any other BMJ products and to exploit all rights, as set out in our [licence](#).

The Submitting Author accepts and understands that any supply made under these terms is made by BMJ to the Submitting Author unless you are acting as an employee on behalf of your employer or a postgraduate student of an affiliated institution which is paying any applicable article publishing charge ("APC") for Open Access articles. Where the Submitting Author wishes to make the Work available on an Open Access basis (and intends to pay the relevant APC), the terms of reuse of such Open Access shall be governed by a Creative Commons licence – details of these licences and which [Creative Commons](#) licence will apply to this Work are set out in our licence referred to above.

Other than as permitted in any relevant BMJ Author's Self Archiving Policies, I confirm this Work has not been accepted for publication elsewhere, is not being considered for publication elsewhere and does not duplicate material already published. I confirm all authors consent to publication of this Work and authorise the granting of this licence.

1  
2  
3 **Factors Influencing the Safety of Outpatient Coronary Computed Tomography Angiography – a**  
4  
5 **Clinical Registry Study**  
6  
7  
8  
9

10  
11 Florian Andre<sup>1,2</sup>, Philipp Fortner<sup>2</sup>, Mostafa Emami<sup>2</sup>, Sebastian Seitz<sup>2</sup>, Matthias Brado<sup>2</sup>, Friedemann  
12  
13 Gückel<sup>2</sup>, Roman Sokiranski<sup>2</sup>, André Sommer<sup>2</sup>, Norbert Frey<sup>1</sup>, Johannes Görich<sup>2</sup>, Sebastian J. Buss<sup>2</sup>  
14  
15

16 <sup>1</sup>University of Heidelberg, Department of Cardiology, Angiology and Pneumology  
17

18 <sup>2</sup>Radiology Center Sinsheim Eberbach Erbach Walldorf Heidelberg  
19  
20  
21  
22

23  
24 **Address of Correspondence:** Florian André  
25  
26 University of Heidelberg  
27  
28 Department of Cardiology, Angiology and Pneumology  
29  
30 Im Neuenheimer Feld 410  
31  
32 69120 Heidelberg  
33  
34 Germany  
35  
36

37  
38 **E-Mail:** florian.andre@med.uni-heidelberg.de  
39

40 **Phone:** + 49 6221 – 56 35908  
41

42 **Fax:** + 49 6221 – 56 5513  
43  
44  
45  
46  
47  
48  
49  
50  
51  
52  
53  
54  
55  
56  
57  
58  
59  
60

## Abstract

### Objectives

Since the safety of coronary CT angiography (CTA) is of great importance, especially with regard to widening indications and increasing morbidity, aim of this study was to assess influencing factors.

### Methods

Patients undergoing coronary CTA in a third-generation dual-source CT in a radiological center were included in a clinical registry. Up to 20 mg metoprolol was administered intravenously to attain a heart rate  $\leq 65$ /min. Glyceryl trinitrate (GTN) was administered in doses of 0.8 mg and 0.4 mg. Blood pressure was measured before the administration and after the CTA.

### Results

Out of 5500 consecutive patients (3194 men, 62.3 (54.9-70.0) years), adverse events occurred in 68 patients (1.2%) with mild anaphylactoid reactions (0.4%), vasovagal symptoms (0.3%), and extravasation (0.3%) being most frequent. Anti-allergic drugs were given in 17 patients, atropine in 3 patients and volume in 1 patient. Drug administration resulted in a significant mean arterial pressure decline (96.0 (88.3-106.0) vs. 108.7 (99.7-117.3) mmHg;  $p < 0.001$ ). Patients, who suffered systolic blood pressure drops  $> 20$  mmHg or  $> 40$  mmHg, were older (66.5 (58.6-73.3) vs. 60.5 (53.6-68.3) years; 70.2 (63.3-76.5) vs. 62.1 (54.7-69.6) years), more often male (65.1% vs. 54.4%; 68.9% vs. 57.3%) and had higher Agatston score equivalents (83.0 (2.0-432.0) vs. 15.0 (0.0-172.0); 163.0 (16.3-830.8) vs. 25.0 (0.0-220.0); all  $p < 0.001$ ). GTN dose reduction lowered the fraction of patients suffering from blood pressure drops  $> 20$  mmHg or  $> 40$  mmHg from 34.5% to 27.4% and from 6.1% to 3.5% (both  $p < 0.001$ ), respectively. The proportion of coronary segments with impaired image quality did not differ significantly.

## Conclusions

Coronary CTA with intravenous beta-blocker administration is a safe procedure in an outpatient setting as adverse events are rare and mostly mild. Reduced GTN doses can further improve safety by lowering the rate of significant blood pressure drops, which occurred especially in elderly men with increased plaque burden.

## Strengths and Limitations of this Study

- The study includes a large population of real-world patients and, thus, its results may be applicable in clinical routine.
- Adverse events, heart rate, and blood pressure characteristics were systematically recorded.
- Analyses were performed to identify patients at increased risk for adverse events.
- To our knowledge, this is the first study assessing the influence of GTN dose on blood pressure and image quality in coronary CTA.
- Follow-up data on the delayed effects of contrast agent administration e.g., on renal function, were not available.

## Keywords

Coronary Artery Disease, Cardiovascular Imaging, Computed Tomography, Clinical Pharmacology, Cardiology

**Trial Registration:** NCT03815123

## Factors Influencing the Safety of Outpatient Coronary Computed Tomography Angiography – a Clinical Registry Study

### Introduction

Over recent years, cardiac computed tomography (CT) has emerged as an essential diagnostic modality for the detection and assessment of coronary artery disease (CAD). Calcium scoring measures the calcified plaque burden without the need for contrast agent application adding incremental prognostic value to standard cardiovascular risk factors<sup>1 2</sup>. Coronary CT angiography (CTA) offers a detailed visualization of the entire coronary tree. In contrast to invasive coronary angiography, coronary CTA not only allows for the quantification of coronary artery stenosis but also the evaluation of plaque morphology including the detection of high-risk plaque features indicating vulnerable lesions<sup>3-5</sup>. In addition, cardiac CT renders the evaluation of the cardiac morphology and adjacent anatomic structures like the aorta and the lungs possible<sup>6</sup>. Its high sensitivity and negative predictive value allow for the reliable exclusion of obstructive CAD. Thus, cardiac CT and especially coronary CTA have been implemented in current guidelines for the diagnosis and management of CAD even being the first-line imaging modality in the current NICE guidelines<sup>7-10</sup>. As cardiac CT is increasingly used and modern CT scanners enable the assessment of significantly calcified vessels or even coronary artery stents, the fragility and morbidity of the patients undergoing coronary CTA increase<sup>11-13</sup>. Thus, the safety of cardiac CT examinations is of paramount importance, especially in an outpatient setting. Although CT angiography is generally regarded to be safe, real-world data on coronary CTA assessing the impact of glyceryl trinitrate (GTN) and intravenous beta-blocker administration are scarce.

The aim of this study was to assess the safety of coronary CTA in a real-world outpatient population, identify influencing factors, and evaluate the benefit of an optimized CTA examination protocol with a reduced GTN dose.



## Methods

Patients were referred to coronary CTA by their attending physician and examinations were performed at a radiological center using a dual-source CT (DSCT) scanner of the third generation (SOMATOM Force, Siemens Healthcare, Erlangen, Germany). Subjects were enrolled in the Heidelberg Cardiac CT Registry and examinations, which were performed between May 2017 and April 2020, were included in this study. The workflow of the optimized coronary CTA examination protocol is given in Figure 1. Usually, an 18 G venous cannula was placed in the antecubital vein, but also 20 G cannulas were inserted into veins of the forearm or even the dorsum of the hand in individual cases. Patients were trained in breathing maneuvers as image acquisition was performed in inspiration breath-hold. Patients received up to 20 mg metoprolol tartrate (Lopressor, Recordati Pharma, Ulm, Germany) intravenously to achieve a heart rate of  $\leq 65$  /min. Glyceryl trinitrate (Nitrolingual, Pohl-Boskamp, Hohenlockstedt, Germany) was administered sublingually to improve the coronary artery visualization in standard doses of 0.8 mg (until April 2019) or 0.4 mg (from May 2019).

Contraindications to the administration of beta-blocker, GTN, or iodine-based contrast agents were assessed by checking the patients' medical history and records as well as the measurement of the renal and thyroid function. Patients with a known allergy to iodinated contrast agents were pretreated according to the current guidelines of the European Society of Urogenital Radiology<sup>14 15</sup>. Calcium scoring was performed before the contrast agent administration for the quantification of the coronary calcium burden and further optimization of the coronary CTA protocol. Between 40 ml and 80 ml prewarmed iomeprol with a concentration of 400 mg I/ml (Imeron 400, Bracco Imaging, Konstanz Germany) was administered at a flow rate between 4.5 and 5.5 ml/s depending on the respective protocol followed by a chaser of 30 ml isotonic saline at a flow rate of 5.0 ml/s. Axial or helical scan modes with automated attenuation-based tube potential and tube current selection (CARE Dose4D, Siemens Healthcare, Erlangen, Germany) were applied. The collimation was 96 x 0.6 mm and a slice acquisition of 192 x 0.6 mm using a z-flying focal spot was used. Advanced Modeled Iterative Reconstruction (ADMIRE) level 3 with dedicated cardiac kernels (usually Bv36 and Bv40) was applied

1  
2  
3 for image reconstruction. The heart rate was recorded during the coronary CTA scan and blood  
4  
5 pressure was measured before the drug administration. In a subgroup, an additional blood pressure  
6  
7 measurement was performed immediately after the coronary CTA examination. The intravenous  
8  
9 access was left for 30 minutes after contrast agent administration as anaphylactoid reactions might  
10  
11 occur delayed.  
12  
13

14  
15 Image analysis was performed on a dedicated workstation (syngo.via, Siemens Healthcare, Erlangen,  
16  
17 Germany) by an experienced cardiologist and radiologist (>4000 cardiac CT examinations). The CT  
18  
19 examinations were reviewed visually before the patient was discharged to account for critical findings,  
20  
21 which might have an immediate therapeutic consequence, whereas the detailed analysis was  
22  
23 conducted afterwards. The results of the examination, as well as clinical data and periprocedural  
24  
25 events, were documented in a dedicated database. Periprocedural events were defined as any incident  
26  
27 impairing the patient's well-being including not only potentially dangerous adverse events e.g.,  
28  
29 anaphylactoid reactions, but also unpleasant symptoms e.g., transient nausea.  
30  
31

32  
33 Anaphylactoid reactions were graded according to severity as described before <sup>16 17</sup>. Briefly, four  
34  
35 classes with increasing severity were employed: I: pruritus or dermal symptoms, II: abdominal,  
36  
37 respiratory, or circulatory symptoms, III: more severe abdominal, respiratory, or circulatory symptoms  
38  
39 including cyanosis and shock, IV: respiratory or cardiac arrest.  
40  
41

42  
43 The cardiac CT examinations were clinically indicated by the referring physician and approval for the  
44  
45 scientific data analysis was obtained from the ethics committee of the University of Heidelberg  
46  
47 (S-226/2016 and S-758/2018). The Heidelberg Cardiac CT registry aims to assess the real-world  
48  
49 diagnostic and prognostic performance of cardiac CT examinations by including all patients undergoing  
50  
51 cardiac CT examinations in an outpatient center.  
52  
53

54  
55 The effect of the GTN dose on the proportion of coronary artery segments with impaired or non-  
56  
57 diagnostic image quality was assessed by two experienced readers in 100 randomly selected patients  
58  
59 with half of them receiving the reduced GTN dose.  
60

## Patient and Public Involvement

Patients, who were prospectively enrolled in the clinical registry, were informed about the general aims and research questions. Since the cardiac CT examinations were clinically indicated, patients could not be involved in the recruitment of the study population or the conduct of the examinations. The results of this study will be implemented in clinical routine and, thus, may be beneficial to future patients.

## Statistics

Continuous data are uniformly given as a median and interquartile range as part of the data showed a non-parametric distribution. Normal distribution was assessed using the D'Agostino-Pearson test. Categorical data are given as numbers and proportions. The Mann-Whitney test was used for the comparison of two groups, the Wilcoxon test for paired samples, and the Kruskal-Wallis test with a posthoc analysis (Conover) for the analysis of several groups as appropriate. The Fisher's exact test was employed for the comparison of categorical data. Multivariate logistic regression analysis was used to model the effect of independent variables on a dichotomous characteristic of interest. In the case of missing values, the number of subjects included in the respective analysis is given at first mention. A p-value <0.05 was regarded as statistically significant. Analyses were conducted using dedicated statistical software (MedCalc Statistical Software version 19 and 20, MedCalc Software, Ostend, Belgium).

## Results

Coronary CTA examinations of 5500 consecutive patients were included in the final study population. Of note, safe venous access could not be established in 7 additional patients and another 2 patients aborted the examination after the calcium scoring scan due to a panic attack and severe

1  
2  
3 claustrophobia. Male were significantly younger than female subjects (61.2 (53.9-69.3) years vs. 63.9  
4 (56.5-71.1) years;  $p<0.001$ ). The patient's characteristics are given in Table 1.  
5  
6

7  
8 Adverse events occurred in 68 patients (1.2 %) with mild anaphylactoid reactions, vasovagal  
9 symptoms, and extravasation being the most frequent. Of note, only mild forms of anaphylactoid  
10 reactions occurred in our study population. Another 36 patients (0.7 %) suffered from severe nausea,  
11 which abated spontaneously within a few minutes in all subjects. An overview of all adverse events is  
12 given in Table 2 and Figure 2. Out of 24 patients (0.4 %) with anaphylactic reactions, 17 received a  
13 medication. Atropine was administered in 3 patients with symptomatic bradycardia and isotonic saline  
14 was administered in one patient with vasovagal symptoms. One patient was referred to the chest pain  
15 unit due to critical coronary artery stenoses in combination with bradycardia after beta-blocker  
16 administration. Two patients were hospitalized due to unstable CAD and another one due to  
17 unexpected pulmonary embolism. In 5 of 16 cases of extravasation, only saline was injected  
18 extravascularly. Of note, all patients could be treated conservatively. Patients with adverse events  
19 were significantly younger (57.3 (50.8-61.6) years vs. 62.4 (55.0-70.1) years;  $p<0.001$ ), which was  
20 mainly driven by the lower age of the subjects suffering from mild anaphylactoid reactions and  
21 vasovagal symptoms ( $p<0.05$ ). The rate of adverse events did not differ significantly between the male  
22 and female patients ( $p=n.s.$ ).  
23  
24  
25  
26  
27  
28  
29  
30  
31  
32  
33  
34  
35  
36  
37  
38  
39  
40  
41

42 The administration of beta-blocker and GTN resulted in a significant decline of the systolic and mean  
43 arterial pressure (134.0 (122.0-150.0) mmHg vs. 150.0 (136.0-165.0) mmHg and 96.0 (88.3-106.0)  
44 mmHg vs. 108.7 (99.7-117.3) mmHg; both  $p<0.001$ ,  $n=5185$ ). Median heart rate was 62.0 (56.0-68.0)  
45 /min ( $n=5324$ ) with men showing a little but significant lower frequency (61.0 (56.0-67.0) /min vs. 63.0  
46 (68.0-69.0) /min;  $p<0.001$ ) during the image acquisition. Patients suffering from systolic blood pressure  
47 drops of more than 20 mmHg and more than 40 mmHg were significantly older (66.5 (58.6-73.3) years  
48 vs. 60.5 (53.6-68.3) years and 70.2 (63.3-76.5) years vs. 62.1 (54.7-69.6) years; both  $p<0.001$ ), were  
49 more often male (65.1 % vs. 54.4 %;  $p<0.001$  and 68.9 % vs. 57.3 %; both  $p<0.001$ ) and had higher  
50 Agatston score equivalents (83.0 (2.0-432.0) vs. 15.0 (0.0-172.0) and 163.0 (16.3-830.8) vs. 25.0 (0.0-  
51  
52  
53  
54  
55  
56  
57  
58  
59  
60

1  
2  
3 220.0), both  $p < 0.001$ ,  $n = 5184$ ). Age, sex and the Agatston score equivalent were significant predictors  
4  
5 for systolic blood pressure drops of more than 40 mmHg in the multivariate regression analysis,  
6  
7 whereas age and sex but not the Agatston score equivalent reached statistical significance for systolic  
8  
9 blood pressure drops of more than 20 mmHg ( $n = 5184$ ).

10  
11  
12 The reduction of the standard GTN dose from 0.8 mg to 0.4 mg ( $n = 3688$ ;  $n = 1812$ ) resulted in small but  
13  
14 significant decreases of the systolic blood pressure drop (15.0 (6.0-25.0) mmHg vs. 12.0 (3.0-21.5)  
15  
16 mmHg) as well as the mean arterial pressure drop (12.3 (5.7-18.7) mmHg vs. 9.7 (3.7-16.3) mmHg;  $n =$   
17  
18 5185; both  $p < 0.001$ ). Of note, the proportions of patients suffering a drop of the systolic blood  
19  
20 pressure of more than 20 mmHg (34.5 % vs. 27.4 %;  $p < 0.001$ ) as well as more than 40 mmHg (6.1 % vs.  
21  
22 3.5 %;  $p < 0.001$ ) declined significantly with the reduction of the GTN dose (Figure 3). Age (62.6 (55.1-  
23  
24 70.4) years vs. 62.2 (54.9-69.6 years),  $n = 5185$ ), sex (57.3 % men vs. 59.1 % men,  $n = 5185$ ) and the  
25  
26 Agatston score equivalents (30.0 (0.0-261.0) vs. 25.0 (0.0-219.0);  $n = 5184$ ) did not differ significantly  
27  
28 between the GTN groups included in the blood pressure analysis (all  $p = n.s.$ ).

29  
30  
31  
32  
33 The proportion of coronary artery segments with impaired or non-diagnostic image quality did not  
34  
35 differ significantly between the GTN dose groups (both  $p = n.s.$ ).

## 36 37 38 39 40 41 **Discussion**

42  
43  
44 Coronary CTA is increasingly used as the first-line diagnostic modality for CAD replacing more and more  
45  
46 diagnostic invasive coronary angiography for the primary assessment of coronary anatomy.  
47  
48 Consequently, the fragility and morbidity of the patients referred to coronary CTA increase.  
49  
50 Periprocedural safety is of great importance in clinical routine and especially in outpatient settings.  
51  
52 Prior data indicate that adverse reactions may occur more frequently in outpatient than inpatient  
53  
54 settings<sup>18</sup> and, additionally, the ability to address emergencies may be limited in some outpatient  
55  
56 facilities. Thus, we assessed the safety of coronary CTA in a large real-world population and evaluated  
57  
58 an optimized coronary CTA examination protocol. The key findings of our studies were as follows. 1)  
59  
60

1  
2  
3 Adverse events such as anaphylactoid reactions and extravasations are rare and mostly mild. 2) The  
4  
5 intravenous administration of beta-blocker in combination with GTN can be regarded as safe when the  
6  
7 dose is thoroughly adapted to the individual patient. 3) The fraction of patients suffering from  
8  
9 significant blood pressure drops is increased especially in elderly men with increased plaque burden.  
10  
11  
12 4) The reduction of the GTN dose reduces the rate of significant blood pressure drops without  
13  
14 impairing the diagnostic image quality.  
15  
16

17  
18 In the study population, anaphylactoid reactions were the most common adverse event with 0.4 % of  
19  
20 cases of whom about two-thirds received medical treatment. Of note, only mild reactions occurred in  
21  
22 our study population and none of the patients required hospitalization. About 0.7 % of the patients  
23  
24 reported transient nausea with none of them needing any medication which is in line with previously  
25  
26 published studies <sup>19-21</sup>. Adverse reactions occurred more often in younger patients which is in  
27  
28 agreement with a study by Gomi et al showing a higher incidence of adverse reactions in patients aged  
29  
30 59 years or less compared with older ones <sup>20</sup>.  
31  
32

33  
34 While the high level of safety of the intravenous administration of current contrast agents was shown  
35  
36 in several studies <sup>22 23</sup>, the use of GTN and beta-blockers in cardiac patients requires an individual  
37  
38 clinical assessment, especially in outpatient settings. Current guidelines approve the oral, intravenous,  
39  
40 or both routes of beta-blocker administration, while an oral premedication followed by supplemental  
41  
42 intravenous application, when necessary, is given as the most common approach <sup>24</sup>. The intravenous  
43  
44 administration results in an immediate reduction of the heart rate and, thus, allows for a precise  
45  
46 titration. In a retrospective study of 560 consecutive patients, the intravenous administration of  
47  
48 atenolol resulted in a better heart rate reduction as well as a faster preparation than the oral intake of  
49  
50 metoprolol <sup>25</sup>. Although patients with atrial fibrillations were not excluded from our study, the median  
51  
52 heart rate after beta-blocker administration was 62.0 (56.0-68.0) /min and, thus, suitable for coronary  
53  
54 CTA using a third-generation DSCT scanner. Yet, safety data on the sole use of intravenous beta-  
55  
56 blockers for rapid heart rate control is limited <sup>25 26</sup>. In our study population, the fraction of patients  
57  
58 with symptomatic bradycardia was approximately 0.1 % and medical intervention was needed in less  
59  
60

1  
2  
3 than half of the cases. Thus, we consider the intravenous administration of metoprolol immediately  
4 before CT image acquisition to be safe, when individually adapted to the patient.  
5  
6

7  
8 GTN causes vasodilation, which can result in a drop in blood pressure and a reactive increase in heart  
9 rate. While some protocols recommend the application of GTN immediately before the coronary CTA  
10 due to its short half-life of 2.5-4.4 min <sup>27</sup>, we recommend its administration before the beta-blocker  
11 application for two reasons. First, the potential reactive heart rate increase can be counteracted by  
12 metoprolol administration adequately. Second, some patients may show an excessive blood pressure  
13 drop and may need the reactive heart rate increase to sustain a sufficient mean arterial pressure, which  
14 would be impeded by prior administered beta-blockers. This compensatory mechanism may be of  
15 importance, especially in multimorbid patients, who often already suffer from a reduced heart rate  
16 adaptation. Of note, in our study, systolic blood pressure drops of more than 20 mmHg or even more  
17 than 40 mmHg occurred prevalently in elderly men with a high plaque burden indicated by the  
18 Agatston score equivalent.  
19  
20  
21  
22  
23  
24  
25  
26  
27  
28  
29  
30  
31

32  
33 In order to further improve the safety of coronary CTA examinations, especially in fragile patients, we  
34 assessed the reduction of the standard GTN dose from 0.8 mg to 0.4 mg. This led to a reduction of the  
35 systolic as well as the mean arterial pressure drops of approximately 3 mmHg, respectively. Although  
36 being statistically highly significant, the clinical relevance of this reduction may seem to be low.  
37  
38 However, the fraction of patients showing drops of more than 20 mmHg as well as more than 40 mmHg  
39 decreased significantly from 34.5 % to 27.4 % and 6.1 % to 3.5 %, respectively. Of note, the image  
40 quality of the coronary CTA was not impaired, being possibly due to the fact that the time of the  
41 maximal drug level of sublingually administered GTN ranges between 2 and 10 min and the half-life of  
42 its vasoactive metabolites is even longer covering the time of the coronary CTA <sup>28</sup>. Thus, the reduction  
43 of the GTN dose may improve patient safety without impairing diagnostic accuracy.  
44  
45  
46  
47  
48  
49  
50  
51  
52  
53  
54  
55  
56  
57  
58  
59  
60

## Limitations

As the data analysis was conducted retrospectively, prospective trials are needed to confirm the improvement in patient safety by the optimized coronary CTA examination protocol. The number of adverse events was low hampering further statistical analyses, especially of subgroups. Since all patients were examined in an outpatient setting, follow-up data on late reactions after contrast agent administration as well as on renal function were not available. Late reactions, occurring up to one week after contrast agent administration, are commonly mild to moderate skin manifestations e.g., maculopapular exanthema, which are self-limiting<sup>29</sup>. Since thyroid function was assessed in all patients and contrast agent was not given in those with contraindications such as manifest hyperthyroidism, the risk of very late reaction occurring after one week i.e., thyrotoxicosis, was negligible<sup>14 30</sup>. The risk of a contrast-induced acute kidney injury was very low as patients with an eGFR <45 ml/min/1.73 m<sup>2</sup> were not examined routinely in this study<sup>31 32</sup>.

Coronary CTA has a lower frequency of major procedure-related complications than invasive coronary angiography, with a similar risk of major adverse cardiovascular events for both diagnostic imaging strategies in patients with stable chest pain as shown in a recent multi-center trial<sup>33</sup>. Since its general safety could be confirmed by our study, which analyzed an even larger population of real-world patients, coronary CTA can be considered an optimal diagnostic modality for CAD assessment in the outpatient setting.

## Conclusions

Coronary CTA with GTN and intravenous beta-blocker administration allows for a safe assessment of CAD in an outpatient setting showing a low frequency of mostly mild adverse events. The use of an optimized coronary CTA examination protocol with a reduced GTN dose results in a lower fraction of patients with significant blood pressure drops and, thus, may further improve safety, especially in fragile patients.



### **Data Availability Statement**

The data set analyzed in this study is not publicly available due to data protection regulations. It is available on reasonable request from the corresponding author.

### **Funding Statement**

This work was supported by a research grant from Siemens Healthineers.

### **Competing Interests Statement**

The Radiology Center received a research grant from Siemens Healthineers. The authors declare, that there are no relationships that could be construed as a conflict of interests.

### **Contributorship Statement**

FA and SJB designed the study and performed the data analysis. PF, SJB, JG, MB, FG, RS and AS contributed to the data acquisition and ME and SS collected and administered the data. JG, AS and NF gave administrative support. All authors contributed to the writing and editing of the manuscript and approved the final version.

## References

1. Detrano R, Guerci AD, Carr JJ, et al. Coronary calcium as a predictor of coronary events in four racial or ethnic groups. *The New England journal of medicine* 2008;358(13):1336-45. doi: 10.1056/NEJMoa072100 [published Online First: 2008/03/28]
2. Yeboah J, McClelland RL, Polonsky TS, et al. Comparison of novel risk markers for improvement in cardiovascular risk assessment in intermediate-risk individuals. *JAMA* 2012;308(8):788-95. doi: 10.1001/jama.2012.9624 [published Online First: 2012/08/23]
3. Williams MC, Moss AJ, Dweck M, et al. Coronary Artery Plaque Characteristics Associated With Adverse Outcomes in the SCOT-HEART Study. *Journal of the American College of Cardiology* 2019;73(3):291-301. doi: 10.1016/j.jacc.2018.10.066 [published Online First: 2019/01/27]
4. Lee JM, Choi KH, Koo BK, et al. Prognostic Implications of Plaque Characteristics and Stenosis Severity in Patients With Coronary Artery Disease. *Journal of the American College of Cardiology* 2019;73(19):2413-24. doi: 10.1016/j.jacc.2019.02.060 [published Online First: 2019/05/18]
5. Williams MC, Kwiecinski J, Doris M, et al. Low-Attenuation Noncalcified Plaque on Coronary Computed Tomography Angiography Predicts Myocardial Infarction: Results From the Multicenter SCOT-HEART Trial (Scottish Computed Tomography of the HEART). *Circulation* 2020 doi: 10.1161/CIRCULATIONAHA.119.044720 [published Online First: 2020/03/17]
6. Kay FU, Canan A, Abbara S. Common Incidental Findings on Cardiac CT: a Systematic Review. *Current Cardiovascular Imaging Reports* 2019;12(6) doi: 10.1007/s12410-019-9494-4
7. Knuuti J, Wijns W, Saraste A, et al. 2019 ESC Guidelines for the diagnosis and management of chronic coronary syndromes. *Eur Heart J* 2020;41(3):407-77. doi: 10.1093/eurheartj/ehz425 [published Online First: 2019/09/11]
8. Excellence NIfHaC. Recent-onset chest pain of suspected cardiac origin: assessment and diagnosis (Clinical Guideline 95). Updated November 2016.: National Institute for Health and Care Excellence (NICE); 2010 [Available from: <https://www.nice.org.uk/guidance/cg95> accessed March 30 th 2020.

- 1  
2  
3 9. Moss AJ, Williams MC, Newby DE, et al. The Updated NICE Guidelines: Cardiac CT as the First-Line  
4  
5 Test for Coronary Artery Disease. *Curr Cardiovasc Imaging Rep* 2017;10(5):15. doi:  
6  
7 10.1007/s12410-017-9412-6 [published Online First: 2017/04/28]  
8  
9
- 10 10. Fihn SD, Gardin JM, Abrams J, et al. 2012 ACCF/AHA/ACP/AATS/PCNA/SCAI/STS Guideline for the  
11  
12 Diagnosis and Management of Patients With Stable Ischemic Heart Disease. *Journal of the*  
13  
14 *American College of Cardiology* 2012;60(24):e44-e164. doi: 10.1016/j.jacc.2012.07.013  
15
- 16 11. Narula J, Chandrashekar Y, Ahmadi A, et al. SCCT 2021 Expert Consensus Document on Coronary  
17  
18 Computed Tomographic Angiography: A Report of the Society of Cardiovascular Computed  
19  
20 Tomography. *J Cardiovasc Comput Tomogr* 2020 doi: 10.1016/j.jcct.2020.11.001 [published  
21  
22 Online First: 2020/12/12]  
23  
24
- 25 12. Giusca S, Schütz M, Kronbach F, et al. Coronary Computer Tomography Angiography in 2021—  
26  
27 Acquisition Protocols, Tips and Tricks and Heading beyond the Possible. *Diagnostics* 2021;11(6)  
28  
29 doi: 10.3390/diagnostics11061072  
30  
31
- 32 13. Ochs MM, Siepen FAD, Fritz T, et al. Limits of the possible: diagnostic image quality in coronary  
33  
34 angiography with third-generation dual-source CT. *Clin Res Cardiol* 2017;106(7):485-92. doi:  
35  
36 10.1007/s00392-017-1077-2 [published Online First: 2017/02/09]  
37  
38
- 39 14. Radiology ESoU. ESUR Guidelines on Contrast Agents 10.02018.  
40
- 41 15. Radiology ESoU. ESUR Guidelines on Contrast Media 9.02014.  
42
- 43 16. Ring J, Messmer K. Incidence and severity of anaphylactoid reactions to colloid volume substitutes.  
44  
45 *Lancet* 1977;1(8009):466-9. doi: 10.1016/s0140-6736(77)91953-5 [published Online First:  
46  
47 1977/02/26]  
48  
49
- 50 17. Ring J, Beyer K, Biedermann T, et al. Guideline for acute therapy and management of anaphylaxis:  
51  
52 S2 Guideline of the German Society for Allergology and Clinical Immunology (DGAKI), the  
53  
54 Association of German Allergologists (AeDA), the Society of Pediatric Allergy and  
55  
56 Environmental Medicine (GPA), the German Academy of Allergology and Environmental  
57  
58 Medicine (DAAU), the German Professional Association of Pediatricians (BVKJ), the Austrian  
59  
60

- 1  
2  
3 Society for Allergy and Immunology (OGAI), the Swiss Society for Allergy and Immunology  
4 (SGAI), the German Society of Anaesthesiology and Intensive Care Medicine (DGAI), the  
5 German Society of Pharmacology (DGP), the German Society for Psychosomatic Medicine  
6 (DGPM), the German Working Group of Anaphylaxis Training and Education (AGATE) and the  
7 patient organization German Allergy and Asthma Association (DAAB). *Allergo J Int*  
8 2014;23(3):96-112. doi: 10.1007/s40629-014-0009-1 [published Online First: 2014/01/01]  
9  
10  
11  
12  
13  
14  
15  
16 18. Dean KE, Starikov A, Giambone A, et al. Adverse reactions to intravenous contrast media: an  
17 unexpected discrepancy between inpatient and outpatient cohorts. *Clin Imaging*  
18 2015;39(5):863-5. doi: 10.1016/j.clinimag.2015.04.014 [published Online First: 2015/07/15]  
19  
20  
21  
22  
23 19. Kim YS, Yoon SH, Choi YH, et al. Nausea and vomiting after exposure to non-ionic contrast media:  
24 incidence and risk factors focusing on preparatory fasting. *Br J Radiol*  
25 2018;91(1087):20180107. doi: 10.1259/bjr.20180107 [published Online First: 2018/04/26]  
26  
27  
28  
29  
30 20. Gomi T, Nagamoto M, Hasegawa M, et al. Are there any differences in acute adverse reactions  
31 among five low-osmolar non-ionic iodinated contrast media? *Eur Radiol* 2010;20(7):1631-5.  
32 doi: 10.1007/s00330-009-1698-6 [published Online First: 2009/12/25]  
33  
34  
35  
36  
37 21. Vijayalakshmi K, Kunadian B, Wright RA, et al. A prospective randomised controlled trial to  
38 determine the early and late reactions after the use of iopamidol 340 (Niopam) and iomeprol  
39 350 (Iomeron) in cardiac catheterisation. *Eur J Radiol* 2007;61(2):342-50. doi:  
40 10.1016/j.ejrad.2006.09.013 [published Online First: 2006/11/15]  
41  
42  
43  
44  
45 22. Andreucci M, Solomon R, Tasanarong A. Side effects of radiographic contrast media: pathogenesis,  
46 risk factors, and prevention. *Biomed Res Int* 2014;2014:741018. doi: 10.1155/2014/741018  
47 [published Online First: 2014/06/05]  
48  
49  
50  
51  
52 23. Lu MT, Douglas PS, Udelson JE, et al. Safety of coronary CT angiography and functional testing for  
53 stable chest pain in the PROMISE trial: A randomized comparison of test complications,  
54 incidental findings, and radiation dose. *J Cardiovasc Comput Tomogr* 2017;11(5):373-82. doi:  
55 10.1016/j.jcct.2017.08.005 [published Online First: 2017/08/26]  
56  
57  
58  
59  
60

- 1  
2  
3 24. Abbara S, Blanke P, Maroules CD, et al. SCCT guidelines for the performance and acquisition of  
4  
5 coronary computed tomographic angiography: A report of the society of Cardiovascular  
6  
7 Computed Tomography Guidelines Committee: Endorsed by the North American Society for  
8  
9 Cardiovascular Imaging (NASCI). *J Cardiovasc Comput Tomogr* 2016;10(6):435-49. doi:  
10  
11 10.1016/j.jcct.2016.10.002 [published Online First: 2016/10/27]  
12  
13  
14 25. Maffei E, Palumbo AA, Martini C, et al. "In-house" pharmacological management for computed  
15  
16 tomography coronary angiography: heart rate reduction, timing and safety of different drugs  
17  
18 used during patient preparation. *Eur Radiol* 2009;19(12):2931-40. doi: 10.1007/s00330-009-  
19  
20 1509-0 [published Online First: 2009/07/15]  
21  
22  
23 26. Kassamali RH, Kim DH, Patel H, et al. Safety of an i.v. beta-adrenergic blockade protocol for heart  
24  
25 rate optimization before coronary CT angiography. *AJR American journal of roentgenology*  
26  
27 2014;203(4):759-62. doi: 10.2214/AJR.13.11492 [published Online First: 2014/09/24]  
28  
29  
30 27. Bell GW, Edwardes M, Dunning AM, et al. Periprocedural safety of 64-detector row coronary  
31  
32 computed tomographic angiography: results from the prospective multicenter ACCURACY  
33  
34 trial. *J Cardiovasc Comput Tomogr* 2010;4(6):375-80. doi: 10.1016/j.jcct.2010.08.003  
35  
36 [published Online First: 2010/10/30]  
37  
38  
39 28. Hashimoto S, Kobayashi A. Clinical pharmacokinetics and pharmacodynamics of glyceryl trinitrate  
40  
41 and its metabolites. *Clin Pharmacokinet* 2003;42(3):205-21. doi: 10.2165/00003088-  
42  
43 200342030-00001 [published Online First: 2003/02/27]  
44  
45  
46 29. Bellin MF, Stacul F, Webb JA, et al. Late adverse reactions to intravascular iodine based contrast  
47  
48 media: an update. *Eur Radiol* 2011;21(11):2305-10. doi: 10.1007/s00330-011-2200-9  
49  
50 [published Online First: 2011/07/23]  
51  
52  
53 30. Bednarczuk T, Brix TH, Schima W, et al. 2021 European Thyroid Association Guidelines for the  
54  
55 Management of Iodine-Based Contrast Media-Induced Thyroid Dysfunction. *Eur Thyroid J*  
56  
57 2021;10(4):269-84. doi: 10.1159/000517175 [published Online First: 2021/08/17]  
58  
59  
60

- 1  
2  
3 31. Solomon R. Contrast-induced acute kidney injury: is there a risk after intravenous contrast? Clin J  
4  
5 Am Soc Nephrol 2008;3(5):1242-3. doi: 10.2215/CJN.03470708 [published Online First:  
6  
7 2008/08/15]  
8  
9  
10 32. Weisbord SD, Mor MK, Resnick AL, et al. Incidence and outcomes of contrast-induced AKI following  
11  
12 computed tomography. Clin J Am Soc Nephrol 2008;3(5):1274-81. doi: 10.2215/CJN.01260308  
13  
14 [published Online First: 2008/05/09]  
15  
16 33. Group DT, Maurovich-Horvat P, Bossertdt M, et al. CT or Invasive Coronary Angiography in Stable  
17  
18 Chest Pain. The New England journal of medicine 2022 doi: 10.1056/NEJMoa2200963  
19  
20 [published Online First: 2022/03/04]  
21  
22  
23  
24  
25  
26  
27  
28  
29  
30  
31  
32  
33  
34  
35  
36  
37  
38  
39  
40  
41  
42  
43  
44  
45  
46  
47  
48  
49  
50  
51  
52  
53  
54  
55  
56  
57  
58  
59  
60

1  
2  
3 **Tables**  
4

5 **Table 1 – Patient characteristics**  
6  
7

|                                            |                     |
|--------------------------------------------|---------------------|
| Age [years]                                | 62.3 (54.9-70.0)    |
| Male                                       | 3194 men (58.1 %)   |
| BMI [kg/m <sup>2</sup> ; n=5285]           | 27.0 (24.4-30.4)    |
| Systolic Arterial Pressure* [mmHg; n=5185] | 150.0 (136.0-165.0) |
| Mean Arterial Pressue* [mmHg; n=5185]      | 108.7 (99.7-117.3)  |
| Agatston Score [n=5499]                    | 28.0 (0.0-242.0)    |

22  
23  
24  
25 BMI: body mass index; \*before the administration of beta-blocker and glyceryl trinitrate  
26  
27  
28  
29

30 **Table 2: Periprocedural events – frequency and patient characteristics**  
31  
32

|                                 | n  | fraction | male | female | age [years]      |
|---------------------------------|----|----------|------|--------|------------------|
| Anaphylactoid Reaction I°/II°   | 24 | 0.4 %    | 12   | 12     | 52.5 (48.0-59.5) |
| Anaphylactoid Reaction III°/IV° | 0  | 0.0 %    | 0    | 0      |                  |
| Vasovagal Symptoms              | 17 | 0.3 %    | 11   | 6      | 56.0 (48.7-61.6) |
| Extravasation                   | 16 | 0.3 %    | 8    | 8      | 60.5 (53.4-67.1) |
| Symptomatic Bradycardia         | 7  | 0.1 %    | 7    | 0      | 59.1 (56.7-67.0) |
| Supraventricular Tachycardia    | 1  | 0.02 %   | 1    | 0      | 58.1             |
| Dizziness/Presyncope            | 2  | 0.04 %   | 0    | 2      | 53.6 (51.5-55.6) |
| Arterial Hypertension           | 1  | 0.02 %   | 0    | 1      | 78.9             |
| Nausea                          | 36 | 0.7 %    | 20   | 16     | 59.8 (52.9-65.7) |

## Figure Captions

### Figure 1: Optimized coronary CTA examination protocol

i.v.: intravenously, G: gauge, SBP: systolic blood pressure, s.l.: sublingually

Common contraindications to metoprolol administration: hemodynamic instability, SBP <90 mmHg, heart rate <50 /min, sick-sinus-syndrome, atrioventricular blockage II°/III°, severe asthma, intake of non-dihydropyridine calcium channel blockers, allergy to beta-blockers

### Figure 2: Number of periprocedural events

The rate of all periprocedural events inclusive of transient nausea was low with 104 of 5500 patients (1.9 %). Adverse events aside from nausea occurred in only 68 patients (1.2 %) and were mostly mild.

### Figure 3: Rate of significant blood pressure drops depending on glyceryl trinitrate dose

The reduction of the standard GTN dose from 0.8 mg to 0.4 mg resulted in significantly lower proportions of patients suffering a drop of the systolic blood pressure >20 mmHg as well as >40 mmHg.

\*p<0.001



1  
2  
3  
4  
5  
6  
7  
8  
9  
10  
11  
12  
13  
14  
15  
16  
17  
18  
19  
20  
21  
22  
23  
24  
25  
26  
27  
28  
29  
30  
31  
32  
33  
34  
35  
36  
37  
38  
39  
40  
41  
42  
43  
44  
45  
46  
47  
48  
49  
50  
51  
52  
53  
54  
55  
56  
57  
58  
59  
60

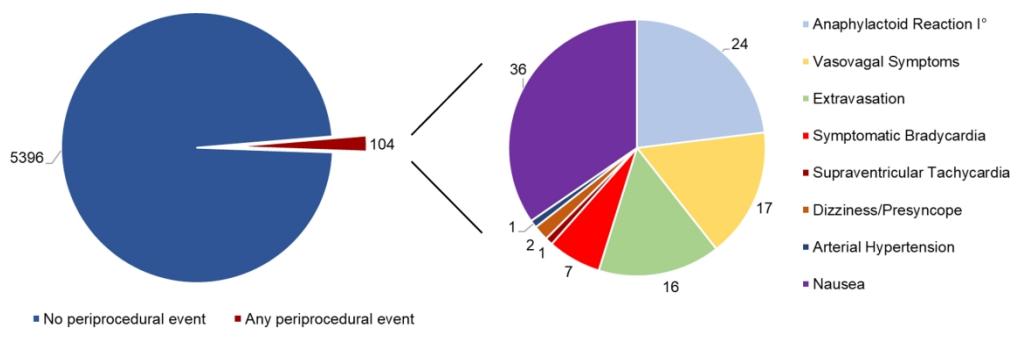

Figure 2: Number of periprocedural events<p>The rate of all periprocedural events inclusive of transient nausea was low with 104 of 5500 patients (1.9 %). Adverse events aside from nausea occurred in only 68 patients (1.2 %) and were mostly mild.

794x250mm (72 x 72 DPI)

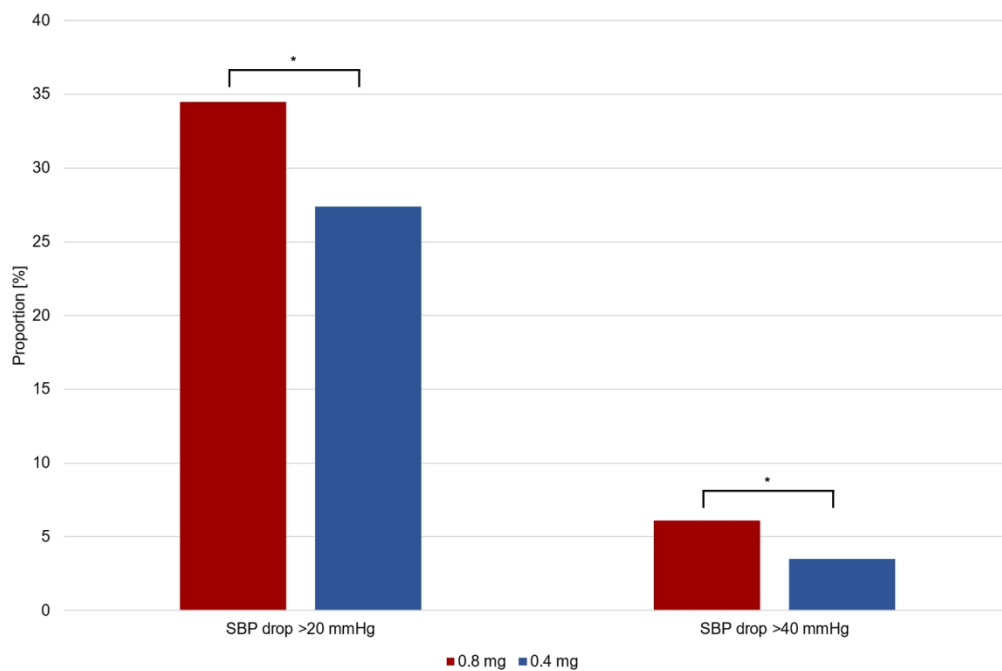

Figure 3: Rate of significant blood pressure drops depending on glyceryl trinitrate dose<p>The reduction of the standard GTN dose from 0.8 mg to 0.4 mg resulted in significantly lower proportions of patients suffering a drop of the systolic blood pressure >20 mmHg as well as >40 mmHg. \*p<0.001

712x467mm (72 x 72 DPI)

## STROBE Statement—checklist of items that should be included in reports of observational studies

|                              | Item No | Recommendation                                                                                                                                                                                                                                                                                                                                                                                                                                                         | Page No  |
|------------------------------|---------|------------------------------------------------------------------------------------------------------------------------------------------------------------------------------------------------------------------------------------------------------------------------------------------------------------------------------------------------------------------------------------------------------------------------------------------------------------------------|----------|
| <b>Title and abstract</b>    | 1       | (a) Indicate the study's design with a commonly used term in the title or the abstract                                                                                                                                                                                                                                                                                                                                                                                 | 1 +<br>2 |
|                              |         | (b) Provide in the abstract an informative and balanced summary of what was done and what was found                                                                                                                                                                                                                                                                                                                                                                    | 2-3      |
| <b>Introduction</b>          |         |                                                                                                                                                                                                                                                                                                                                                                                                                                                                        |          |
| Background/rationale         | 2       | Explain the scientific background and rationale for the investigation being reported                                                                                                                                                                                                                                                                                                                                                                                   | 4        |
| Objectives                   | 3       | State specific objectives, including any prespecified hypotheses                                                                                                                                                                                                                                                                                                                                                                                                       | 4        |
| <b>Methods</b>               |         |                                                                                                                                                                                                                                                                                                                                                                                                                                                                        |          |
| Study design                 | 4       | Present key elements of study design early in the paper                                                                                                                                                                                                                                                                                                                                                                                                                | 5        |
| Setting                      | 5       | Describe the setting, locations, and relevant dates, including periods of recruitment, exposure, follow-up, and data collection                                                                                                                                                                                                                                                                                                                                        | 5-6      |
| Participants                 | 6       | (a) <i>Cohort study</i> —Give the eligibility criteria, and the sources and methods of selection of participants. Describe methods of follow-up<br><i>Case-control study</i> —Give the eligibility criteria, and the sources and methods of case ascertainment and control selection. Give the rationale for the choice of cases and controls<br><i>Cross-sectional study</i> —Give the eligibility criteria, and the sources and methods of selection of participants | 5        |
|                              |         | (b) <i>Cohort study</i> —For matched studies, give matching criteria and number of exposed and unexposed<br><i>Case-control study</i> —For matched studies, give matching criteria and the number of controls per case                                                                                                                                                                                                                                                 | 5        |
| Variables                    | 7       | Clearly define all outcomes, exposures, predictors, potential confounders, and effect modifiers. Give diagnostic criteria, if applicable                                                                                                                                                                                                                                                                                                                               | 5-6      |
| Data sources/<br>measurement | 8*      | For each variable of interest, give sources of data and details of methods of assessment (measurement). Describe comparability of assessment methods if there is more than one group                                                                                                                                                                                                                                                                                   | 6        |
| Bias                         | 9       | Describe any efforts to address potential sources of bias                                                                                                                                                                                                                                                                                                                                                                                                              | 5        |
| Study size                   | 10      | Explain how the study size was arrived at                                                                                                                                                                                                                                                                                                                                                                                                                              | 5        |
| Quantitative variables       | 11      | Explain how quantitative variables were handled in the analyses. If applicable, describe which groupings were chosen and why                                                                                                                                                                                                                                                                                                                                           | 6-7      |
| Statistical methods          | 12      | (a) Describe all statistical methods, including those used to control for confounding                                                                                                                                                                                                                                                                                                                                                                                  | 7        |
|                              |         | (b) Describe any methods used to examine subgroups and interactions                                                                                                                                                                                                                                                                                                                                                                                                    | 7        |
|                              |         | (c) Explain how missing data were addressed                                                                                                                                                                                                                                                                                                                                                                                                                            | 7        |
|                              |         | (d) <i>Cohort study</i> —If applicable, explain how loss to follow-up was addressed<br><i>Case-control study</i> —If applicable, explain how matching of cases and controls was addressed<br><i>Cross-sectional study</i> —If applicable, describe analytical methods taking account of sampling strategy                                                                                                                                                              | n.a.     |
|                              |         | (e) Describe any sensitivity analyses                                                                                                                                                                                                                                                                                                                                                                                                                                  | n.a.     |

Continued on next page

| <b>Results</b>           |     |                                                                                                                                                                                                              |       |
|--------------------------|-----|--------------------------------------------------------------------------------------------------------------------------------------------------------------------------------------------------------------|-------|
| Participants             | 13* | (a) Report numbers of individuals at each stage of study—eg numbers potentially eligible, examined for eligibility, confirmed eligible, included in the study, completing follow-up, and analysed            | 7     |
|                          |     | (b) Give reasons for non-participation at each stage                                                                                                                                                         | 5-7   |
|                          |     | (c) Consider use of a flow diagram                                                                                                                                                                           | n.a.  |
| Descriptive data         | 14* | (a) Give characteristics of study participants (eg demographic, clinical, social) and information on exposures and potential confounders                                                                     | 7-8   |
|                          |     | (b) Indicate number of participants with missing data for each variable of interest                                                                                                                          | 7-9   |
|                          |     | (c) <i>Cohort study</i> —Summarise follow-up time (eg, average and total amount)                                                                                                                             | n.a.  |
| Outcome data             | 15* | <i>Cohort study</i> —Report numbers of outcome events or summary measures over time                                                                                                                          | 8-9   |
|                          |     | <i>Case-control study</i> —Report numbers in each exposure category, or summary measures of exposure                                                                                                         |       |
|                          |     | <i>Cross-sectional study</i> —Report numbers of outcome events or summary measures                                                                                                                           |       |
| Main results             | 16  | (a) Give unadjusted estimates and, if applicable, confounder-adjusted estimates and their precision (eg, 95% confidence interval). Make clear which confounders were adjusted for and why they were included | 8-9   |
|                          |     | (b) Report category boundaries when continuous variables were categorized                                                                                                                                    | 9     |
|                          |     | (c) If relevant, consider translating estimates of relative risk into absolute risk for a meaningful time period                                                                                             | n.a.  |
| Other analyses           | 17  | Report other analyses done—eg analyses of subgroups and interactions, and sensitivity analyses                                                                                                               | 9     |
| <b>Discussion</b>        |     |                                                                                                                                                                                                              |       |
| Key results              | 18  | Summarise key results with reference to study objectives                                                                                                                                                     | 9-10  |
| Limitations              | 19  | Discuss limitations of the study, taking into account sources of potential bias or imprecision. Discuss both direction and magnitude of any potential bias                                                   | 12    |
| Interpretation           | 20  | Give a cautious overall interpretation of results considering objectives, limitations, multiplicity of analyses, results from similar studies, and other relevant evidence                                   | 10-12 |
| Generalisability         | 21  | Discuss the generalisability (external validity) of the study results                                                                                                                                        | 12    |
| <b>Other information</b> |     |                                                                                                                                                                                                              |       |
| Funding                  | 22  | Give the source of funding and the role of the funders for the present study and, if applicable, for the original study on which the present article is based                                                | 13    |

\*Give information separately for cases and controls in case-control studies and, if applicable, for exposed and unexposed groups in cohort and cross-sectional studies.

**Note:** An Explanation and Elaboration article discusses each checklist item and gives methodological background and published examples of transparent reporting. The STROBE checklist is best used in conjunction with this article (freely available on the Web sites of PLoS Medicine at <http://www.plosmedicine.org/>, Annals of Internal Medicine at <http://www.annals.org/>, and Epidemiology at <http://www.epidem.com/>). Information on the STROBE Initiative is available at [www.strobe-statement.org](http://www.strobe-statement.org).

# BMJ Open

## Factors Influencing the Safety of Outpatient Coronary Computed Tomography Angiography – a Clinical Registry Study

|                                 |                                                                                                                                                                                                                                                                                                                                                                                                                                                                                                                                                                                                                                                                                                                                                                                                                                                                                                                                                                                                                                                                               |
|---------------------------------|-------------------------------------------------------------------------------------------------------------------------------------------------------------------------------------------------------------------------------------------------------------------------------------------------------------------------------------------------------------------------------------------------------------------------------------------------------------------------------------------------------------------------------------------------------------------------------------------------------------------------------------------------------------------------------------------------------------------------------------------------------------------------------------------------------------------------------------------------------------------------------------------------------------------------------------------------------------------------------------------------------------------------------------------------------------------------------|
| Journal:                        | <i>BMJ Open</i>                                                                                                                                                                                                                                                                                                                                                                                                                                                                                                                                                                                                                                                                                                                                                                                                                                                                                                                                                                                                                                                               |
| Manuscript ID                   | bmjopen-2021-058304.R2                                                                                                                                                                                                                                                                                                                                                                                                                                                                                                                                                                                                                                                                                                                                                                                                                                                                                                                                                                                                                                                        |
| Article Type:                   | Original research                                                                                                                                                                                                                                                                                                                                                                                                                                                                                                                                                                                                                                                                                                                                                                                                                                                                                                                                                                                                                                                             |
| Date Submitted by the Author:   | 24-Jun-2022                                                                                                                                                                                                                                                                                                                                                                                                                                                                                                                                                                                                                                                                                                                                                                                                                                                                                                                                                                                                                                                                   |
| Complete List of Authors:       | <p>Andre, Florian; Heidelberg University, Department of Cardiology, Angiology and Pneumology; Radiology Center Sinsheim Eberbach Erbach Walldorf Heidelberg</p> <p>Fortner, Philipp; Radiology Center Sinsheim Eberbach Erbach Walldorf Heidelberg</p> <p>Emami, Mostafa; Radiology Center Sinsheim Eberbach Erbach Walldorf Heidelberg</p> <p>Seitz, Sebastian; Radiology Center Sinsheim Eberbach Erbach Walldorf Heidelberg</p> <p>Brado, Matthias; Radiology Center Sinsheim Eberbach Erbach Walldorf Heidelberg</p> <p>Gückel, Friedemann; Radiology Center Sinsheim Eberbach Erbach Walldorf Heidelberg</p> <p>Sokiranski, Roman; Radiology Center Sinsheim Eberbach Erbach Walldorf Heidelberg</p> <p>Sommer, André; Radiology Center Sinsheim Eberbach Erbach Walldorf Heidelberg</p> <p>Frey, Norbert; Heidelberg University, Department of Cardiology, Angiology and Pneumology</p> <p>Görich, Johannes; Radiology Center Sinsheim Eberbach Erbach Walldorf Heidelberg</p> <p>Buss, Sebastian J.; Radiology Center Sinsheim Eberbach Erbach Walldorf Heidelberg</p> |
| <b>Primary Subject Heading</b>: | Radiology and imaging                                                                                                                                                                                                                                                                                                                                                                                                                                                                                                                                                                                                                                                                                                                                                                                                                                                                                                                                                                                                                                                         |
| Secondary Subject Heading:      | Cardiovascular medicine, Pharmacology and therapeutics                                                                                                                                                                                                                                                                                                                                                                                                                                                                                                                                                                                                                                                                                                                                                                                                                                                                                                                                                                                                                        |
| Keywords:                       | Coronary heart disease < RADIOLOGY, Cardiovascular imaging < RADIOLOGY & IMAGING, Computed tomography < RADIOLOGY & IMAGING, Cardiology < INTERNAL MEDICINE, Adverse events < THERAPEUTICS, CLINICAL PHARMACOLOGY                                                                                                                                                                                                                                                                                                                                                                                                                                                                                                                                                                                                                                                                                                                                                                                                                                                             |
|                                 |                                                                                                                                                                                                                                                                                                                                                                                                                                                                                                                                                                                                                                                                                                                                                                                                                                                                                                                                                                                                                                                                               |

1  
2  
3  
4  
5  
6  
7  
8  
9  
10  
11  
12  
13  
14  
15  
16  
17  
18  
19  
20  
21  
22  
23  
24  
25  
26  
27  
28  
29  
30  
31  
32  
33  
34  
35  
36  
37  
38  
39  
40  
41  
42  
43  
44  
45  
46  
47  
48  
49  
50  
51  
52  
53  
54  
55  
56  
57  
58  
59  
60



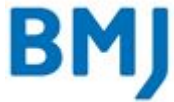

I, the Submitting Author has the right to grant and does grant on behalf of all authors of the Work (as defined in the below author licence), an exclusive licence and/or a non-exclusive licence for contributions from authors who are: i) UK Crown employees; ii) where BMJ has agreed a CC-BY licence shall apply, and/or iii) in accordance with the terms applicable for US Federal Government officers or employees acting as part of their official duties; on a worldwide, perpetual, irrevocable, royalty-free basis to BMJ Publishing Group Ltd ("BMJ") its licensees and where the relevant Journal is co-owned by BMJ to the co-owners of the Journal, to publish the Work in this journal and any other BMJ products and to exploit all rights, as set out in our [licence](#).

The Submitting Author accepts and understands that any supply made under these terms is made by BMJ to the Submitting Author unless you are acting as an employee on behalf of your employer or a postgraduate student of an affiliated institution which is paying any applicable article publishing charge ("APC") for Open Access articles. Where the Submitting Author wishes to make the Work available on an Open Access basis (and intends to pay the relevant APC), the terms of reuse of such Open Access shall be governed by a Creative Commons licence – details of these licences and which [Creative Commons](#) licence will apply to this Work are set out in our licence referred to above.

Other than as permitted in any relevant BMJ Author's Self Archiving Policies, I confirm this Work has not been accepted for publication elsewhere, is not being considered for publication elsewhere and does not duplicate material already published. I confirm all authors consent to publication of this Work and authorise the granting of this licence.

1  
2  
3 **Factors Influencing the Safety of Outpatient Coronary Computed Tomography Angiography – a**  
4  
5 **Clinical Registry Study**  
6  
7  
8  
9

10  
11 Florian Andre<sup>1,2</sup>, Philipp Fortner<sup>2</sup>, Mostafa Emami<sup>2</sup>, Sebastian Seitz<sup>2</sup>, Matthias Brado<sup>2</sup>, Friedemann  
12  
13 Gückel<sup>2</sup>, Roman Sokiranski<sup>2</sup>, André Sommer<sup>2</sup>, Norbert Frey<sup>1</sup>, Johannes Görich<sup>2</sup>, Sebastian J. Buss<sup>2</sup>  
14  
15

16 <sup>1</sup>University of Heidelberg, Department of Cardiology, Angiology and Pneumology  
17

18 <sup>2</sup>Radiology Center Sinsheim Eberbach Erbach Walldorf Heidelberg  
19  
20  
21  
22

23  
24 **Address of Correspondence:** Florian André  
25  
26 University of Heidelberg  
27  
28 Department of Cardiology, Angiology and Pneumology  
29  
30 Im Neuenheimer Feld 410  
31  
32 69120 Heidelberg  
33  
34 Germany  
35  
36

37  
38 **E-Mail:** florian.andre@med.uni-heidelberg.de  
39

40 **Phone:** + 49 6221 – 56 35908  
41

42 **Fax:** + 49 6221 – 56 5513  
43  
44  
45  
46  
47  
48  
49  
50  
51  
52  
53  
54  
55  
56  
57  
58  
59  
60



## Abstract

### Objectives

Since the safety of coronary CT angiography (CTA) is of great importance, especially with regard to widening indications and increasing morbidity, aim of this study was to assess influencing factors.

### Methods

Patients undergoing coronary CTA in a third-generation dual-source CT in a radiological center were included in a clinical registry. Up to 20 mg metoprolol was administered intravenously to attain a heart rate  $\leq 65$ /min. Glyceryl trinitrate (GTN) was administered in doses of 0.8 mg and 0.4 mg. Blood pressure was measured before the administration and after the CTA.

### Results

Out of 5500 consecutive patients (3194 men, 62.3 (54.9-70.0) years), adverse events occurred in 68 patients (1.2%) with mild anaphylactoid reactions (0.4%), vasovagal symptoms (0.3%), and extravasation (0.3%) being most frequent. Anti-allergic drugs were given in 17 patients, atropine in 3 patients and volume in 1 patient. Drug administration resulted in a significant mean arterial pressure decline (96.0 (88.3-106.0) vs. 108.7 (99.7-117.3) mmHg;  $p < 0.001$ ). Patients, who suffered systolic blood pressure drops  $> 20$  mmHg or  $> 40$  mmHg, were older (66.5 (58.6-73.3) vs. 60.5 (53.6-68.3) years; 70.2 (63.3-76.5) vs. 62.1 (54.7-69.6) years), more often male (65.1% vs. 54.4%; 68.9% vs. 57.3%) and had higher Agatston score equivalents (83.0 (2.0-432.0) vs. 15.0 (0.0-172.0); 163.0 (16.3-830.8) vs. 25.0 (0.0-220.0); all  $p < 0.001$ ). GTN dose reduction lowered the fraction of patients suffering from blood pressure drops  $> 20$  mmHg or  $> 40$  mmHg from 34.5% to 27.4% and from 6.1% to 3.5% (both  $p < 0.001$ ), respectively. The proportion of coronary segments with impaired image quality did not differ significantly.

## Conclusions

Coronary CTA with intravenous beta-blocker administration is a safe procedure in an outpatient setting as adverse events are rare and mostly mild. Reduced GTN doses can further improve safety by lowering the rate of significant blood pressure drops, which occurred especially in elderly men with increased plaque burden.

## Strengths and Limitations of this Study

- The study includes a large population of real-world patients and, thus, its results may be applicable in clinical routine.
- Adverse events, heart rate, and blood pressure characteristics were systematically recorded.
- Analyses were performed to identify patients at increased risk for adverse events.
- To our knowledge, this is the first study assessing the influence of GTN dose on blood pressure and image quality in coronary CTA.
- Follow-up data on the delayed effects of contrast agent administration e.g., on renal function, were not available.

## Keywords

Coronary Artery Disease, Cardiovascular Imaging, Computed Tomography, Clinical Pharmacology, Cardiology

**Trial Registration:** NCT03815123

## Factors Influencing the Safety of Outpatient Coronary Computed Tomography Angiography – a Clinical Registry Study

### Introduction

Over recent years, cardiac computed tomography (CT) has emerged as an essential diagnostic modality for the detection and assessment of coronary artery disease (CAD). Calcium scoring measures the calcified plaque burden without the need for contrast agent application adding incremental prognostic value to standard cardiovascular risk factors<sup>1 2</sup>. Coronary CT angiography (CTA) offers a detailed visualization of the entire coronary tree. In contrast to invasive coronary angiography, coronary CTA not only allows for the quantification of coronary artery stenosis but also the evaluation of plaque morphology including the detection of high-risk plaque features indicating vulnerable lesions<sup>3-5</sup>. In addition, cardiac CT renders the evaluation of the cardiac morphology and adjacent anatomic structures like the aorta and the lungs possible<sup>6</sup>. Its high sensitivity and negative predictive value allow for the reliable exclusion of obstructive CAD. Thus, cardiac CT and especially coronary CTA have been implemented in current guidelines for the diagnosis and management of CAD even being the first-line imaging modality in the current NICE guidelines<sup>7-10</sup>. As cardiac CT is increasingly used and modern CT scanners enable the assessment of significantly calcified vessels or even coronary artery stents, the fragility and morbidity of the patients undergoing coronary CTA increase<sup>11-13</sup>. Thus, the safety of cardiac CT examinations is of paramount importance, especially in an outpatient setting. Although CT angiography is generally regarded to be safe, real-world data on coronary CTA assessing the impact of glyceryl trinitrate (GTN) and intravenous beta-blocker administration are scarce.

The aim of this study was to assess the safety of coronary CTA in a real-world outpatient population, identify influencing factors, and evaluate the benefit of an optimized CTA examination protocol with a reduced GTN dose.

## Methods

Patients underwent coronary CTA at a radiological center using a dual-source CT (DSCT) scanner of the third generation (SOMATOM Force, Siemens Healthcare, Erlangen, Germany). Patients were referred to the CT examination by their attending physicians considering their symptoms, cardiovascular risk profile, and previous examinations results. The indication was counter-checked by a radiologist. Subjects were enrolled in the Heidelberg Cardiac CT Registry and examinations, which were performed between May 2017 and April 2020, were included in this study. The workflow of the optimized coronary CTA examination protocol is given in Figure 1. Usually, an 18 G venous cannula was placed in the antecubital vein, but also 20 G cannulas were inserted into veins of the forearm or even the dorsum of the hand in individual cases. Patients were trained in breathing maneuvers as image acquisition was performed in inspiration breath-hold. Patients received up to 20 mg metoprolol tartrate (Lopressor, Recordati Pharma, Ulm, Germany) intravenously to achieve a heart rate of  $\leq 65$  /min. Glyceryl trinitrate (Nitrolingual, Pohl-Boskamp, Hohenlockstedt, Germany) was administered sublingually to improve the coronary artery visualization in standard doses of 0.8 mg (until April 2019) or 0.4 mg (from May 2019). Contraindications to the administration of beta-blocker, GTN, or iodine-based contrast agents were assessed by checking the patients' medical history and records as well as the measurement of the renal and thyroid function. Patients with a known allergy to iodinated contrast agents were pretreated according to the current guidelines of the European Society of Urogenital Radiology<sup>14 15</sup>. Calcium scoring was performed before the contrast agent administration for the quantification of the coronary calcium burden and further optimization of the coronary CTA protocol. Between 40 ml and 80 ml prewarmed iomeprol with a concentration of 400 mg I/ml (Imeron 400, Bracco Imaging, Konstanz Germany) was administered at a flow rate between 4.5 and 5.5 ml/s depending on the respective protocol followed by a chaser of 30 ml isotonic saline at a flow rate of 5.0 ml/s. Axial or helical scan modes with automated attenuation-based tube potential and tube current selection (CARE Dose4D, Siemens Healthcare, Erlangen, Germany) were applied. The collimation was 96 x 0.6 mm and a slice acquisition of 192 x 0.6 mm using a z-flying focal spot was used. Advanced Modeled Iterative

1  
2  
3 Reconstruction (ADMIRE) level 3 with dedicated cardiac kernels (usually Bv36 and Bv40) was applied  
4  
5 for image reconstruction. The heart rate was recorded during the coronary CTA scan and blood  
6  
7 pressure was measured before the drug administration. In a subgroup, an additional blood pressure  
8  
9 measurement was performed immediately after the coronary CTA examination. The intravenous  
10  
11 access was left for 30 minutes after contrast agent administration as anaphylactoid reactions might  
12  
13 occur delayed.  
14  
15

16  
17 Image analysis was performed on a dedicated workstation (syngo.via, Siemens Healthcare, Erlangen,  
18  
19 Germany) by an experienced cardiologist and radiologist (>4000 cardiac CT examinations). The CT  
20  
21 examinations were reviewed visually before the patient was discharged to account for critical findings,  
22  
23 which might have an immediate therapeutic consequence, whereas the detailed analysis was  
24  
25 conducted afterwards. The results of the examination, as well as clinical data and periprocedural  
26  
27 events, were documented in a dedicated database. Periprocedural events were defined as any incident  
28  
29 impairing the patient's well-being including not only potentially dangerous adverse events e.g.,  
30  
31 anaphylactoid reactions, but also unpleasant symptoms e.g., transient nausea.  
32  
33

34  
35 Anaphylactoid reactions were graded according to severity as described before <sup>16 17</sup>. Briefly, four  
36  
37 classes with increasing severity were employed: I: pruritus or dermal symptoms, II: abdominal,  
38  
39 respiratory, or circulatory symptoms, III: more severe abdominal, respiratory, or circulatory symptoms  
40  
41 including cyanosis and shock, IV: respiratory or cardiac arrest.  
42  
43  
44

45  
46 The cardiac CT examinations were clinically indicated by the referring physician and approval for the  
47  
48 scientific data analysis was obtained from the ethics committee of the University of Heidelberg  
49  
50 (S-226/2016 and S-758/2018). The Heidelberg Cardiac CT registry aims to assess the real-world  
51  
52 diagnostic and prognostic performance of cardiac CT examinations by including all patients undergoing  
53  
54 cardiac CT examinations in an outpatient center.  
55  
56  
57  
58  
59  
60

1  
2  
3 The effect of the GTN dose on the proportion of coronary artery segments with impaired or non-  
4 diagnostic image quality was assessed by two experienced readers in 100 randomly selected patients  
5  
6 with half of them receiving the reduced GTN dose.  
7  
8  
9

### 10 11 12 13 Patient and Public Involvement

14  
15  
16 Patients, who were prospectively enrolled in the clinical registry, were informed about the general  
17 aims and research questions. Since the cardiac CT examinations were clinically indicated, patients  
18 could not be involved in the recruitment of the study population or the conduct of the examinations.  
19  
20 The results of this study will be implemented in clinical routine and, thus, may be beneficial to future  
21 patients.  
22  
23  
24  
25  
26  
27  
28  
29  
30

### 31 Statistics

32  
33  
34 Continuous data are uniformly given as a median and interquartile range as part of the data showed a  
35 non-parametric distribution. Normal distribution was assessed using the D'Agostino-Pearson test.  
36  
37 Categorical data are given as numbers and proportions. The Mann-Whitney test was used for the  
38 comparison of two groups, the Wilcoxon test for paired samples, and the Kruskal-Wallis test with a  
39 posthoc analysis (Conover) for the analysis of several groups as appropriate. The Fisher's exact test  
40 was employed for the comparison of categorical data. Multivariate logistic regression analysis was  
41 used to model the effect of independent variables on a dichotomous characteristic of interest. In the  
42 case of missing values, the number of subjects included in the respective analysis is given at first  
43 mention. A p-value <0.05 was regarded as statistically significant. Analyses were conducted using  
44 dedicated statistical software (MedCalc Statistical Software version 19 and 20, MedCalc Software,  
45 Ostend, Belgium).  
46  
47  
48  
49  
50  
51  
52  
53  
54  
55  
56  
57  
58  
59  
60

## Results

Coronary CTA examinations of 5500 consecutive patients were included in the final study population.

Of note, safe venous access could not be established in 7 additional patients and another 2 patients aborted the examination after the calcium scoring scan due to a panic attack and severe claustrophobia. Male were significantly younger than female subjects (61.2 (53.9-69.3) years vs. 63.9 (56.5-71.1) years;  $p<0.001$ ). While in most patients an obstructive CAD was not known, 175 patients (3.2 %) had previously undergone percutaneous coronary intervention with coronary stent implantation and 48 patients (0.9 %) coronary artery bypass surgery or both. Further patient characteristics are given in Table 1 and displayed in Figure 2.

Adverse events occurred in 68 patients (1.2 %) with mild anaphylactoid reactions, vasovagal symptoms, and extravasation being the most frequent. Of note, only mild forms of anaphylactoid reactions occurred in our study population. Another 36 patients (0.7 %) suffered from severe nausea, which abated spontaneously within a few minutes in all subjects. An overview of all adverse events is given in Table 2 and Figure 3. Out of 24 patients (0.4 %) with anaphylactic reactions, 17 received a medication. Atropine was administered in 3 patients with symptomatic bradycardia and isotonic saline was administered in one patient with vasovagal symptoms. One patient was referred to the chest pain unit due to critical coronary artery stenoses in combination with bradycardia after beta-blocker administration. Two patients were hospitalized due to unstable CAD and another one due to unexpected pulmonary embolism. In 5 of 16 cases of extravasation, only saline was injected extravascularly. Of note, all patients could be treated conservatively. Patients with adverse events were significantly younger (57.3 (50.8-61.6) years vs. 62.4 (55.0-70.1) years;  $p<0.001$ ), which was mainly driven by the lower age of the subjects suffering from mild anaphylactoid reactions and vasovagal symptoms ( $p<0.05$ ). The rate of adverse events did not differ significantly between the male and female patients ( $p=n.s.$ ).

1  
2  
3 The administration of beta-blocker and GTN resulted in a significant decline of the systolic and mean  
4 arterial pressure (134.0 (122.0-150.0) mmHg vs. 150.0 (136.0-165.0) mmHg and 96.0 (88.3-106.0)  
5 mmHg vs. 108.7 (99.7-117.3) mmHg; both  $p < 0.001$ ,  $n = 5185$ ). Median heart rate was 62.0 (56.0-68.0)  
6 /min ( $n = 5324$ ) with men showing a little but significant lower frequency (61.0 (56.0-67.0) /min vs. 63.0  
7 (68.0-69.0) /min;  $p < 0.001$ ) during the image acquisition. Patients suffering from systolic blood pressure  
8 drops of more than 20 mmHg and more than 40 mmHg were significantly older (66.5 (58.6-73.3) years  
9 vs. 60.5 (53.6-68.3) years and 70.2 (63.3-76.5) years vs. 62.1 (54.7-69.6) years; both  $p < 0.001$ ), were  
10 more often male (65.1 % vs. 54.4 %;  $p < 0.001$  and 68.9 % vs. 57.3 %; both  $p < 0.001$ ) and had higher  
11 Agatston score equivalents (83.0 (2.0-432.0) vs. 15.0 (0.0-172.0) and 163.0 (16.3-830.8) vs. 25.0 (0.0-  
12 220.0), both  $p < 0.001$ ,  $n = 5184$ ). Age, sex and the Agatston score equivalent were significant predictors  
13 for systolic blood pressure drops of more than 40 mmHg in the multivariate regression analysis,  
14 whereas age and sex but not the Agatston score equivalent reached statistical significance for systolic  
15 blood pressure drops of more than 20 mmHg ( $n = 5184$ ).

16  
17  
18  
19  
20  
21  
22  
23  
24  
25  
26  
27  
28  
29  
30  
31  
32  
33 The reduction of the standard GTN dose from 0.8 mg to 0.4 mg ( $n = 3688$ ;  $n = 1812$ ) resulted in small but  
34 significant decreases of the systolic blood pressure drop (15.0 (6.0-25.0) mmHg vs. 12.0 (3.0-21.5)  
35 mmHg) as well as the mean arterial pressure drop (12.3 (5.7-18.7) mmHg vs. 9.7 (3.7-16.3) mmHg;  $n =$   
36 5185; both  $p < 0.001$ ). Of note, the proportions of patients suffering a drop of the systolic blood  
37 pressure of more than 20 mmHg (34.5 % vs. 27.4 %;  $p < 0.001$ ) as well as more than 40 mmHg (6.1 % vs.  
38 3.5 %;  $p < 0.001$ ) declined significantly with the reduction of the GTN dose (Figure 4). Age (62.6 (55.1-  
39 70.4) years vs. 62.2 (54.9-69.6) years),  $n = 5185$ , sex (57.3 % men vs. 59.1 % men,  $n = 5185$ ) and the  
40 Agatston score equivalents (30.0 (0.0-261.0) vs. 25.0 (0.0-219.0);  $n = 5184$ ) did not differ significantly  
41 between the GTN groups included in the blood pressure analysis (all  $p = n.s.$ ).

42  
43  
44  
45  
46  
47  
48  
49  
50  
51  
52  
53  
54 The proportion of coronary artery segments with impaired or non-diagnostic image quality did not  
55 differ significantly between the GTN dose groups (both  $p = n.s.$ ). Of note, neither Agatston score nor  
56 heart rate differed significantly between groups (both  $p = n.s.$ ).



## Discussion

Coronary CTA is increasingly used as the first-line diagnostic modality for CAD replacing more and more diagnostic invasive coronary angiography for the primary assessment of coronary anatomy. Consequently, the fragility and morbidity of the patients referred to coronary CTA increase. Periprocedural safety is of great importance in clinical routine and especially in outpatient settings. Prior data indicate that adverse reactions may occur more frequently in outpatient than inpatient settings<sup>18</sup> and, additionally, the ability to address emergencies may be limited in some outpatient facilities. Thus, we assessed the safety of coronary CTA in a large real-world population and evaluated an optimized coronary CTA examination protocol. The key findings of our studies were as follows.

- 1) Adverse events such as anaphylactoid reactions and extravasations are rare and mostly mild.
- 2) The intravenous administration of beta-blocker in combination with GTN can be regarded as safe when the dose is thoroughly adapted to the individual patient.
- 3) The fraction of patients suffering from significant blood pressure drops is increased especially in elderly men with increased plaque burden.
- 4) The reduction of the GTN dose reduces the rate of significant blood pressure drops without impairing the diagnostic image quality.

In the study population, anaphylactoid reactions were the most common adverse event with 0.4 % of cases of whom about two-thirds received medical treatment. Of note, only mild reactions occurred in our study population and none of the patients required hospitalization. About 0.7 % of the patients reported transient nausea with none of them needing any medication which is in line with previously published studies<sup>19-21</sup>. Adverse reactions occurred more often in younger patients which is in agreement with a study by Gomi et al showing a higher incidence of adverse reactions in patients aged 59 years or less compared with older ones<sup>20</sup>.

While the high level of safety of the intravenous administration of current contrast agents was shown in several studies<sup>22 23</sup>, the use of GTN and beta-blockers in cardiac patients requires an individual clinical assessment, especially in outpatient settings. Current guidelines approve the oral, intravenous,

1  
2  
3 or both routes of beta-blocker administration, while an oral premedication followed by supplemental  
4  
5 intravenous application, when necessary, is given as the most common approach <sup>24</sup>. The intravenous  
6  
7 administration results in an immediate reduction of the heart rate and, thus, allows for a precise  
8  
9 titration. In a retrospective study of 560 consecutive patients, the intravenous administration of  
10  
11 atenolol resulted in a better heart rate reduction as well as a faster preparation than the oral intake of  
12  
13 metoprolol <sup>25</sup>. Although patients with atrial fibrillations were not excluded from our study, the median  
14  
15 heart rate after beta-blocker administration was 62.0 (56.0-68.0) /min and, thus, suitable for coronary  
16  
17 CTA using a third-generation DSCT scanner, which is able to provide diagnostic image quality  
18  
19 independent of heart rate and heart rhythm <sup>13</sup>. Yet, safety data on the sole use of intravenous beta-  
20  
21 blockers for rapid heart rate control is limited <sup>25 26</sup>. In our study population, the fraction of patients  
22  
23 with symptomatic bradycardia was approximately 0.1 % and medical intervention was needed in less  
24  
25 than half of the cases. Thus, we consider the intravenous administration of metoprolol immediately  
26  
27 before CT image acquisition to be safe, when individually adapted to the patient.  
28  
29  
30

31  
32  
33 GTN causes vasodilation, which can result in a drop in blood pressure and a reactive increase in heart  
34  
35 rate. While some protocols recommend the application of GTN immediately before the coronary CTA  
36  
37 due to its short half-life of 2.5-4.4 min <sup>27</sup>, we recommend its administration before the beta-blocker  
38  
39 application for two reasons. First, the potential reactive heart rate increase can be counteracted by  
40  
41 metoprolol administration adequately. Second, some patients may show an excessive blood pressure  
42  
43 drop and may need the reactive heart rate increase to sustain a sufficient mean arterial pressure, which  
44  
45 would be impeded by prior administered beta-blockers. This compensatory mechanism may be of  
46  
47 importance, especially in multimorbid patients, who often already suffer from a reduced heart rate  
48  
49 adaptation. Of note, in our study, systolic blood pressure drops of more than 20 mmHg or even more  
50  
51 than 40 mmHg occurred prevalently in elderly men with a high plaque burden indicated by the  
52  
53 Agatston score equivalent.  
54  
55  
56

57  
58 In order to further improve the safety of coronary CTA examinations, especially in fragile patients, we  
59  
60 assessed the reduction of the standard GTN dose from 0.8 mg to 0.4 mg. This led to a reduction of the

1  
2  
3 systolic as well as the mean arterial pressure drops of approximately 3 mmHg, respectively. Although  
4 being statistically highly significant, the clinical relevance of this reduction may seem to be low.  
5  
6 However, the fraction of patients showing drops of more than 20 mmHg as well as more than 40 mmHg  
7  
8 decreased significantly from 34.5 % to 27.4 % and 6.1 % to 3.5 %, respectively. Of note, the image  
9  
10 quality of the coronary CTA was not impaired, being possibly due to the fact that the time of the  
11  
12 maximal drug level of sublingually administered GTN ranges between 2 and 10 min and the half-life of  
13  
14 its vasoactive metabolites is even longer covering the time of the coronary CTA <sup>28</sup>. Thus, the reduction  
15  
16 of the GTN dose may improve patient safety without impairing diagnostic accuracy.  
17  
18  
19  
20  
21  
22  
23  
24

### 25 **Limitations**

26  
27 As the data analysis was conducted retrospectively, prospective trials are needed to confirm the  
28  
29 improvement in patient safety by the optimized coronary CTA examination protocol. The number of  
30  
31 adverse events was low hampering further statistical analyses, especially of subgroups. Since all  
32  
33 patients were examined in an outpatient setting, follow-up data on late reactions after contrast agent  
34  
35 administration as well as on renal function were not available. Late reactions, occurring up to one week  
36  
37 after contrast agent administration, are commonly mild to moderate skin manifestations e.g.,  
38  
39 maculopapular exanthema, which are self-limiting <sup>29</sup>. Since thyroid function was assessed in all patients  
40  
41 and contrast agent was not given in those with contraindications such as manifest hyperthyroidism,  
42  
43 the risk of very late reaction occurring after one week i.e., thyrotoxicosis, was negligible <sup>14 30</sup>. The risk  
44  
45 of a contrast-induced acute kidney injury was very low as patients with an eGFR <45 ml/min/1.73 m<sup>2</sup>  
46  
47 were not examined routinely in this study <sup>31 32</sup>.  
48  
49  
50  
51

52  
53 Coronary CTA has a lower frequency of major procedure-related complications than invasive coronary  
54  
55 angiography, with a similar risk of major adverse cardiovascular events, as shown in a recent multi-  
56  
57 center trial comparing both modalities as initial diagnostic imaging strategies for guiding the treatment  
58  
59 of patients with stable chest pain <sup>33</sup>. Since its general safety could be confirmed by our study, which  
60

1  
2  
3 analyzed an even larger population of real-world patients, coronary CTA can be considered an optimal  
4  
5 diagnostic modality for CAD assessment in the outpatient setting.  
6  
7  
8  
9

## 10 11 **Conclusions**

12  
13  
14 Coronary CTA with GTN and intravenous beta-blocker administration allows for a safe assessment of  
15  
16 CAD in an outpatient setting showing a low frequency of mostly mild adverse events. The use of an  
17  
18 optimized coronary CTA examination protocol with a reduced GTN dose results in a lower fraction of  
19  
20 patients with significant blood pressure drops and, thus, may further improve safety, especially in  
21  
22 fragile patients.  
23  
24  
25  
26  
27  
28  
29  
30  
31  
32  
33  
34  
35  
36  
37  
38  
39  
40  
41  
42  
43  
44  
45  
46  
47  
48  
49  
50  
51  
52  
53  
54  
55  
56  
57  
58  
59  
60

### **Data Availability Statement**

The data set analyzed in this study is not publicly available due to data protection regulations. It is available on reasonable request from the corresponding author.

### **Funding Statement**

This work was supported by a research grant from Siemens Healthineers (grant number N/A).

### **Competing Interests Statement**

The Radiology Center received a research grant from Siemens Healthineers. The authors declare, that there are no relationships that could be construed as a conflict of interests.

### **Contributorship Statement**

FA and SJB designed the study and performed the data analysis. PF, SJB, JG, MB, FG, RS and AS contributed to the data acquisition and ME and SS collected and administered the data. JG, AS and NF gave administrative support. All authors contributed to the writing and editing of the manuscript and approved the final version.

### **Ethics statement**

Universität Heidelberg, Ethikkommission der Medizinischen Fakultät, S-226/2016 and S-758/2018

## References

1. Detrano R, Guerci AD, Carr JJ, et al. Coronary calcium as a predictor of coronary events in four racial or ethnic groups. *The New England journal of medicine* 2008;358(13):1336-45. doi: 10.1056/NEJMoa072100 [published Online First: 2008/03/28]
2. Yeboah J, McClelland RL, Polonsky TS, et al. Comparison of novel risk markers for improvement in cardiovascular risk assessment in intermediate-risk individuals. *JAMA* 2012;308(8):788-95. doi: 10.1001/jama.2012.9624 [published Online First: 2012/08/23]
3. Williams MC, Moss AJ, Dweck M, et al. Coronary Artery Plaque Characteristics Associated With Adverse Outcomes in the SCOT-HEART Study. *Journal of the American College of Cardiology* 2019;73(3):291-301. doi: 10.1016/j.jacc.2018.10.066 [published Online First: 2019/01/27]
4. Lee JM, Choi KH, Koo BK, et al. Prognostic Implications of Plaque Characteristics and Stenosis Severity in Patients With Coronary Artery Disease. *Journal of the American College of Cardiology* 2019;73(19):2413-24. doi: 10.1016/j.jacc.2019.02.060 [published Online First: 2019/05/18]
5. Williams MC, Kwiecinski J, Doris M, et al. Low-Attenuation Noncalcified Plaque on Coronary Computed Tomography Angiography Predicts Myocardial Infarction: Results From the Multicenter SCOT-HEART Trial (Scottish Computed Tomography of the HEART). *Circulation* 2020 doi: 10.1161/CIRCULATIONAHA.119.044720 [published Online First: 2020/03/17]
6. Kay FU, Canan A, Abbara S. Common Incidental Findings on Cardiac CT: a Systematic Review. *Current Cardiovascular Imaging Reports* 2019;12(6) doi: 10.1007/s12410-019-9494-4
7. Knuuti J, Wijns W, Saraste A, et al. 2019 ESC Guidelines for the diagnosis and management of chronic coronary syndromes. *Eur Heart J* 2020;41(3):407-77. doi: 10.1093/eurheartj/ehz425 [published Online First: 2019/09/11]
8. Excellence NIfHaC. Recent-onset chest pain of suspected cardiac origin: assessment and diagnosis (Clinical Guideline 95). Updated November 2016.: National Institute for Health and Care Excellence (NICE); 2010 [Available from: <https://www.nice.org.uk/guidance/cg95> accessed March 30 th 2020.

- 1  
2  
3 9. Moss AJ, Williams MC, Newby DE, et al. The Updated NICE Guidelines: Cardiac CT as the First-Line  
4  
5 Test for Coronary Artery Disease. *Curr Cardiovasc Imaging Rep* 2017;10(5):15. doi:  
6  
7 10.1007/s12410-017-9412-6 [published Online First: 2017/04/28]  
8  
9
10. Fihn SD, Gardin JM, Abrams J, et al. 2012 ACCF/AHA/ACP/AATS/PCNA/SCAI/STS Guideline for the  
11  
12 Diagnosis and Management of Patients With Stable Ischemic Heart Disease. *Journal of the*  
13  
14 *American College of Cardiology* 2012;60(24):e44-e164. doi: 10.1016/j.jacc.2012.07.013  
15
- 16 11. Narula J, Chandrashekar Y, Ahmadi A, et al. SCCT 2021 Expert Consensus Document on Coronary  
17  
18 Computed Tomographic Angiography: A Report of the Society of Cardiovascular Computed  
19  
20 Tomography. *J Cardiovasc Comput Tomogr* 2020 doi: 10.1016/j.jcct.2020.11.001 [published  
21  
22 Online First: 2020/12/12]  
23  
24
- 25 12. Giusca S, Schütz M, Kronbach F, et al. Coronary Computer Tomography Angiography in 2021—  
26  
27 Acquisition Protocols, Tips and Tricks and Heading beyond the Possible. *Diagnostics* 2021;11(6)  
28  
29 doi: 10.3390/diagnostics11061072  
30  
31
- 32 13. Ochs MM, Siepen FAD, Fritz T, et al. Limits of the possible: diagnostic image quality in coronary  
33  
34 angiography with third-generation dual-source CT. *Clin Res Cardiol* 2017;106(7):485-92. doi:  
35  
36 10.1007/s00392-017-1077-2 [published Online First: 2017/02/09]  
37  
38
- 39 14. Radiology ESoU. ESUR Guidelines on Contrast Agents 10.02018.  
40
- 41 15. Radiology ESoU. ESUR Guidelines on Contrast Media 9.02014.  
42
- 43 16. Ring J, Messmer K. Incidence and severity of anaphylactoid reactions to colloid volume substitutes.  
44  
45 *Lancet* 1977;1(8009):466-9. doi: 10.1016/s0140-6736(77)91953-5 [published Online First:  
46  
47 1977/02/26]  
48  
49
- 50 17. Ring J, Beyer K, Biedermann T, et al. Guideline for acute therapy and management of anaphylaxis:  
51  
52 S2 Guideline of the German Society for Allergology and Clinical Immunology (DGAKI), the  
53  
54 Association of German Allergologists (AeDA), the Society of Pediatric Allergy and  
55  
56 Environmental Medicine (GPA), the German Academy of Allergology and Environmental  
57  
58 Medicine (DAAU), the German Professional Association of Pediatricians (BVKJ), the Austrian  
59  
60

- 1  
2  
3 Society for Allergy and Immunology (OGAI), the Swiss Society for Allergy and Immunology  
4  
5 (SGAI), the German Society of Anaesthesiology and Intensive Care Medicine (DGAI), the  
6  
7 German Society of Pharmacology (DGP), the German Society for Psychosomatic Medicine  
8  
9 (DGPM), the German Working Group of Anaphylaxis Training and Education (AGATE) and the  
10  
11 patient organization German Allergy and Asthma Association (DAAB). *Allergo J Int*  
12  
13 2014;23(3):96-112. doi: 10.1007/s40629-014-0009-1 [published Online First: 2014/01/01]  
14  
15
- 16 18. Dean KE, Starikov A, Giambone A, et al. Adverse reactions to intravenous contrast media: an  
17  
18 unexpected discrepancy between inpatient and outpatient cohorts. *Clin Imaging*  
19  
20 2015;39(5):863-5. doi: 10.1016/j.clinimag.2015.04.014 [published Online First: 2015/07/15]  
21  
22
- 23 19. Kim YS, Yoon SH, Choi YH, et al. Nausea and vomiting after exposure to non-ionic contrast media:  
24  
25 incidence and risk factors focusing on preparatory fasting. *Br J Radiol*  
26  
27 2018;91(1087):20180107. doi: 10.1259/bjr.20180107 [published Online First: 2018/04/26]  
28  
29
- 30 20. Gomi T, Nagamoto M, Hasegawa M, et al. Are there any differences in acute adverse reactions  
31  
32 among five low-osmolar non-ionic iodinated contrast media? *Eur Radiol* 2010;20(7):1631-5.  
33  
34 doi: 10.1007/s00330-009-1698-6 [published Online First: 2009/12/25]  
35  
36
- 37 21. Vijayalakshmi K, Kunadian B, Wright RA, et al. A prospective randomised controlled trial to  
38  
39 determine the early and late reactions after the use of iopamidol 340 (Niopam) and iomeprol  
40  
41 350 (Iomeron) in cardiac catheterisation. *Eur J Radiol* 2007;61(2):342-50. doi:  
42  
43 10.1016/j.ejrad.2006.09.013 [published Online First: 2006/11/15]  
44  
45
- 46 22. Andreucci M, Solomon R, Tasanarong A. Side effects of radiographic contrast media: pathogenesis,  
47  
48 risk factors, and prevention. *Biomed Res Int* 2014;2014:741018. doi: 10.1155/2014/741018  
49  
50 [published Online First: 2014/06/05]  
51
- 52 23. Lu MT, Douglas PS, Udelson JE, et al. Safety of coronary CT angiography and functional testing for  
53  
54 stable chest pain in the PROMISE trial: A randomized comparison of test complications,  
55  
56 incidental findings, and radiation dose. *J Cardiovasc Comput Tomogr* 2017;11(5):373-82. doi:  
57  
58 10.1016/j.jcct.2017.08.005 [published Online First: 2017/08/26]  
59  
60



- 1  
2  
3 24. Abbara S, Blanke P, Maroules CD, et al. SCCT guidelines for the performance and acquisition of  
4 coronary computed tomographic angiography: A report of the society of Cardiovascular  
5 Computed Tomography Guidelines Committee: Endorsed by the North American Society for  
6 Cardiovascular Imaging (NASCI). *J Cardiovasc Comput Tomogr* 2016;10(6):435-49. doi:  
7 10.1016/j.jcct.2016.10.002 [published Online First: 2016/10/27]  
8  
9  
10  
11  
12  
13  
14 25. Maffei E, Palumbo AA, Martini C, et al. "In-house" pharmacological management for computed  
15 tomography coronary angiography: heart rate reduction, timing and safety of different drugs  
16 used during patient preparation. *Eur Radiol* 2009;19(12):2931-40. doi: 10.1007/s00330-009-  
17 1509-0 [published Online First: 2009/07/15]  
18  
19  
20  
21  
22  
23 26. Kassamali RH, Kim DH, Patel H, et al. Safety of an i.v. beta-adrenergic blockade protocol for heart  
24 rate optimization before coronary CT angiography. *AJR American journal of roentgenology*  
25 2014;203(4):759-62. doi: 10.2214/AJR.13.11492 [published Online First: 2014/09/24]  
26  
27  
28  
29  
30 27. Bell GW, Edwardes M, Dunning AM, et al. Periprocedural safety of 64-detector row coronary  
31 computed tomographic angiography: results from the prospective multicenter ACCURACY  
32 trial. *J Cardiovasc Comput Tomogr* 2010;4(6):375-80. doi: 10.1016/j.jcct.2010.08.003  
33 [published Online First: 2010/10/30]  
34  
35  
36  
37  
38  
39 28. Hashimoto S, Kobayashi A. Clinical pharmacokinetics and pharmacodynamics of glyceryl trinitrate  
40 and its metabolites. *Clin Pharmacokinet* 2003;42(3):205-21. doi: 10.2165/00003088-  
41 200342030-00001 [published Online First: 2003/02/27]  
42  
43  
44  
45  
46 29. Bellin MF, Stacul F, Webb JA, et al. Late adverse reactions to intravascular iodine based contrast  
47 media: an update. *Eur Radiol* 2011;21(11):2305-10. doi: 10.1007/s00330-011-2200-9  
48 [published Online First: 2011/07/23]  
49  
50  
51  
52 30. Bednarczuk T, Brix TH, Schima W, et al. 2021 European Thyroid Association Guidelines for the  
53 Management of Iodine-Based Contrast Media-Induced Thyroid Dysfunction. *Eur Thyroid J*  
54 2021;10(4):269-84. doi: 10.1159/000517175 [published Online First: 2021/08/17]  
55  
56  
57  
58  
59  
60

- 1  
2  
3 31. Solomon R. Contrast-induced acute kidney injury: is there a risk after intravenous contrast? Clin J  
4  
5 Am Soc Nephrol 2008;3(5):1242-3. doi: 10.2215/CJN.03470708 [published Online First:  
6  
7 2008/08/15]  
8  
9  
10 32. Weisbord SD, Mor MK, Resnick AL, et al. Incidence and outcomes of contrast-induced AKI following  
11  
12 computed tomography. Clin J Am Soc Nephrol 2008;3(5):1274-81. doi: 10.2215/CJN.01260308  
13  
14 [published Online First: 2008/05/09]  
15  
16 33. Group DT, Maurovich-Horvat P, Bosserdt M, et al. CT or Invasive Coronary Angiography in Stable  
17  
18 Chest Pain. The New England journal of medicine 2022 doi: 10.1056/NEJMoa2200963  
19  
20 [published Online First: 2022/03/04]  
21  
22  
23  
24  
25  
26  
27  
28  
29  
30  
31  
32  
33  
34  
35  
36  
37  
38  
39  
40  
41  
42  
43  
44  
45  
46  
47  
48  
49  
50  
51  
52  
53  
54  
55  
56  
57  
58  
59  
60

1  
2  
3 **Tables**  
4

5 **Table 1 – Patient characteristics**  
6  
7

|                                            |                     |
|--------------------------------------------|---------------------|
| Age [years]                                | 62.3 (54.9-70.0)    |
| Sex                                        | 3194 men (58.1 %)   |
| BMI [kg/m <sup>2</sup> ; n=5285]           | 27.0 (24.4-30.4)    |
| Systolic Arterial Pressure* [mmHg; n=5185] | 150.0 (136.0-165.0) |
| Mean Arterial Pressure* [mmHg; n=5185]     | 108.7 (99.7-117.3)  |
| Agatston Score [n=5499]                    | 28.0 (0.0-242.0)    |

22  
23  
24  
25 BMI: body mass index; \*before the administration of beta-blocker and glyceryl trinitrate  
26  
27  
28  
29

30 **Table 2: Periprocedural events – frequency and patient characteristics**  
31  
32

|                                 | n  | fraction | male | female | age [years]      |
|---------------------------------|----|----------|------|--------|------------------|
| Anaphylactoid Reaction I°/II°   | 24 | 0.4 %    | 12   | 12     | 52.5 (48.0-59.5) |
| Anaphylactoid Reaction III°/IV° | 0  | 0.0 %    | 0    | 0      |                  |
| Vasovagal Symptoms              | 17 | 0.3 %    | 11   | 6      | 56.0 (48.7-61.6) |
| Extravasation                   | 16 | 0.3 %    | 8    | 8      | 60.5 (53.4-67.1) |
| Symptomatic Bradycardia         | 7  | 0.1 %    | 7    | 0      | 59.1 (56.7-67.0) |
| Supraventricular Tachycardia    | 1  | 0.02 %   | 1    | 0      | 58.1             |
| Dizziness/Presyncope            | 2  | 0.04 %   | 0    | 2      | 53.6 (51.5-55.6) |
| Arterial Hypertension           | 1  | 0.02 %   | 0    | 1      | 78.9             |
| Nausea                          | 36 | 0.7 %    | 20   | 16     | 59.8 (52.9-65.7) |

## Figure Captions

### Figure 1: Optimized coronary CTA examination protocol

i.v.: intravenously, G: gauge, SBP: systolic blood pressure, s.l.: sublingually

Common contraindications to metoprolol administration: hemodynamic instability, SBP <90 mmHg, heart rate <50 /min, sick-sinus-syndrome, atrioventricular blockage II°/III°, severe asthma, intake of non-dihydropyridine calcium channel blockers, allergy to beta-blockers

### Figure 2: Age distribution

The majority of patients was between 50 and 70 years old and men were slightly but significantly younger than women (61.2 (53.9-69.3) years vs. 63.9 (56.5-71.1) years;  $p<0.001$ ).

### Figure 3: Number of periprocedural events

The rate of all periprocedural events inclusive of transient nausea was low with 104 of 5500 patients (1.9 %). Adverse events aside from nausea occurred in only 68 patients (1.2 %) and were mostly mild.

### Figure 4: Rate of significant blood pressure drops depending on glyceryl trinitrate dose

The reduction of the standard GTN dose from 0.8 mg to 0.4 mg resulted in significantly lower proportions of patients suffering a drop of the systolic blood pressure >20 mmHg as well as >40 mmHg.

\* $p<0.001$

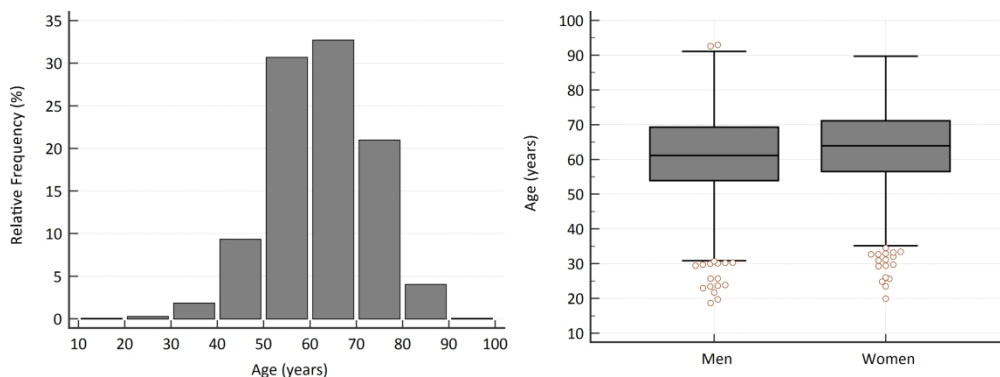

Figure 2: Age distribution<p>The majority of patients was between 50 and 70 years old and men were slightly but significantly younger than women (61.2 (53.9-69.3) years vs. 63.9 (56.5-71.1) years; p<0.001).

944x347mm (72 x 72 DPI)

1  
2  
3  
4  
5  
6  
7  
8  
9  
10  
11  
12  
13  
14  
15  
16  
17  
18  
19  
20  
21  
22  
23  
24  
25  
26  
27  
28  
29  
30  
31  
32  
33  
34  
35  
36  
37  
38  
39  
40  
41  
42  
43  
44  
45  
46  
47  
48  
49  
50  
51  
52  
53  
54  
55  
56  
57  
58  
59  
60



Figure 3: Number of periprocedural events<p>The rate of all periprocedural events inclusive of transient nausea was low with 104 of 5500 patients (1.9 %). Adverse events aside from nausea occurred in only 68 patients (1.2 %) and were mostly mild.

794x250mm (72 x 72 DPI)

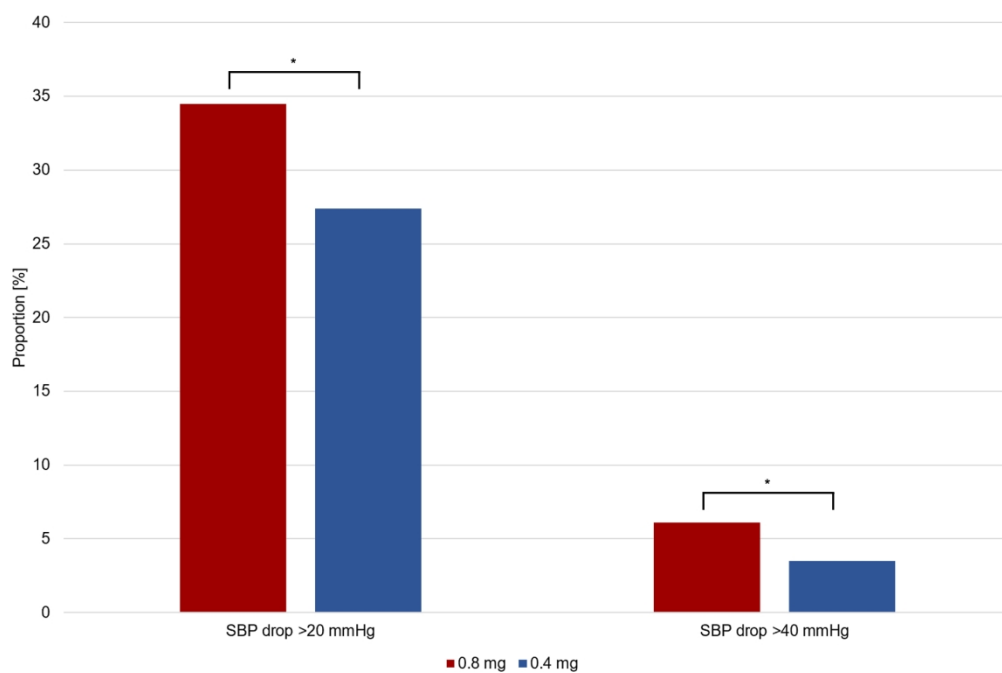

Figure 4: Rate of significant blood pressure drops depending on glyceryl trinitrate dose. The reduction of the standard GTN dose from 0.8 mg to 0.4 mg resulted in significantly lower proportions of patients suffering a drop of the systolic blood pressure >20 mmHg as well as >40 mmHg. \* $p < 0.001$

712x467mm (72 x 72 DPI)

## STROBE Statement—checklist of items that should be included in reports of observational studies

|                              | Item No | Recommendation                                                                                                                                                                                                                                                                                                                                                                                                                                                         | Page No  |
|------------------------------|---------|------------------------------------------------------------------------------------------------------------------------------------------------------------------------------------------------------------------------------------------------------------------------------------------------------------------------------------------------------------------------------------------------------------------------------------------------------------------------|----------|
| <b>Title and abstract</b>    | 1       | (a) Indicate the study's design with a commonly used term in the title or the abstract                                                                                                                                                                                                                                                                                                                                                                                 | 1 +<br>2 |
|                              |         | (b) Provide in the abstract an informative and balanced summary of what was done and what was found                                                                                                                                                                                                                                                                                                                                                                    | 2-3      |
| <b>Introduction</b>          |         |                                                                                                                                                                                                                                                                                                                                                                                                                                                                        |          |
| Background/rationale         | 2       | Explain the scientific background and rationale for the investigation being reported                                                                                                                                                                                                                                                                                                                                                                                   | 4        |
| Objectives                   | 3       | State specific objectives, including any prespecified hypotheses                                                                                                                                                                                                                                                                                                                                                                                                       | 4        |
| <b>Methods</b>               |         |                                                                                                                                                                                                                                                                                                                                                                                                                                                                        |          |
| Study design                 | 4       | Present key elements of study design early in the paper                                                                                                                                                                                                                                                                                                                                                                                                                | 5        |
| Setting                      | 5       | Describe the setting, locations, and relevant dates, including periods of recruitment, exposure, follow-up, and data collection                                                                                                                                                                                                                                                                                                                                        | 5-6      |
| Participants                 | 6       | (a) <i>Cohort study</i> —Give the eligibility criteria, and the sources and methods of selection of participants. Describe methods of follow-up<br><i>Case-control study</i> —Give the eligibility criteria, and the sources and methods of case ascertainment and control selection. Give the rationale for the choice of cases and controls<br><i>Cross-sectional study</i> —Give the eligibility criteria, and the sources and methods of selection of participants | 5        |
|                              |         | (b) <i>Cohort study</i> —For matched studies, give matching criteria and number of exposed and unexposed<br><i>Case-control study</i> —For matched studies, give matching criteria and the number of controls per case                                                                                                                                                                                                                                                 | 5        |
| Variables                    | 7       | Clearly define all outcomes, exposures, predictors, potential confounders, and effect modifiers. Give diagnostic criteria, if applicable                                                                                                                                                                                                                                                                                                                               | 5-6      |
| Data sources/<br>measurement | 8*      | For each variable of interest, give sources of data and details of methods of assessment (measurement). Describe comparability of assessment methods if there is more than one group                                                                                                                                                                                                                                                                                   | 6        |
| Bias                         | 9       | Describe any efforts to address potential sources of bias                                                                                                                                                                                                                                                                                                                                                                                                              | 5        |
| Study size                   | 10      | Explain how the study size was arrived at                                                                                                                                                                                                                                                                                                                                                                                                                              | 5        |
| Quantitative variables       | 11      | Explain how quantitative variables were handled in the analyses. If applicable, describe which groupings were chosen and why                                                                                                                                                                                                                                                                                                                                           | 6-7      |
| Statistical methods          | 12      | (a) Describe all statistical methods, including those used to control for confounding                                                                                                                                                                                                                                                                                                                                                                                  | 7        |
|                              |         | (b) Describe any methods used to examine subgroups and interactions                                                                                                                                                                                                                                                                                                                                                                                                    | 7        |
|                              |         | (c) Explain how missing data were addressed                                                                                                                                                                                                                                                                                                                                                                                                                            | 7        |
|                              |         | (d) <i>Cohort study</i> —If applicable, explain how loss to follow-up was addressed<br><i>Case-control study</i> —If applicable, explain how matching of cases and controls was addressed<br><i>Cross-sectional study</i> —If applicable, describe analytical methods taking account of sampling strategy                                                                                                                                                              | n.a.     |
|                              |         | (e) Describe any sensitivity analyses                                                                                                                                                                                                                                                                                                                                                                                                                                  | n.a.     |

Continued on next page



| <b>Results</b>           |     |                                                                                                                                                                                                              |       |
|--------------------------|-----|--------------------------------------------------------------------------------------------------------------------------------------------------------------------------------------------------------------|-------|
| Participants             | 13* | (a) Report numbers of individuals at each stage of study—eg numbers potentially eligible, examined for eligibility, confirmed eligible, included in the study, completing follow-up, and analysed            | 7     |
|                          |     | (b) Give reasons for non-participation at each stage                                                                                                                                                         | 5-7   |
|                          |     | (c) Consider use of a flow diagram                                                                                                                                                                           | n.a.  |
| Descriptive data         | 14* | (a) Give characteristics of study participants (eg demographic, clinical, social) and information on exposures and potential confounders                                                                     | 7-8   |
|                          |     | (b) Indicate number of participants with missing data for each variable of interest                                                                                                                          | 7-9   |
|                          |     | (c) <i>Cohort study</i> —Summarise follow-up time (eg, average and total amount)                                                                                                                             | n.a.  |
| Outcome data             | 15* | <i>Cohort study</i> —Report numbers of outcome events or summary measures over time                                                                                                                          | 8-9   |
|                          |     | <i>Case-control study</i> —Report numbers in each exposure category, or summary measures of exposure                                                                                                         |       |
|                          |     | <i>Cross-sectional study</i> —Report numbers of outcome events or summary measures                                                                                                                           |       |
| Main results             | 16  | (a) Give unadjusted estimates and, if applicable, confounder-adjusted estimates and their precision (eg, 95% confidence interval). Make clear which confounders were adjusted for and why they were included | 8-9   |
|                          |     | (b) Report category boundaries when continuous variables were categorized                                                                                                                                    | 9     |
|                          |     | (c) If relevant, consider translating estimates of relative risk into absolute risk for a meaningful time period                                                                                             | n.a.  |
| Other analyses           | 17  | Report other analyses done—eg analyses of subgroups and interactions, and sensitivity analyses                                                                                                               | 9     |
| <b>Discussion</b>        |     |                                                                                                                                                                                                              |       |
| Key results              | 18  | Summarise key results with reference to study objectives                                                                                                                                                     | 9-10  |
| Limitations              | 19  | Discuss limitations of the study, taking into account sources of potential bias or imprecision. Discuss both direction and magnitude of any potential bias                                                   | 12    |
| Interpretation           | 20  | Give a cautious overall interpretation of results considering objectives, limitations, multiplicity of analyses, results from similar studies, and other relevant evidence                                   | 10-12 |
| Generalisability         | 21  | Discuss the generalisability (external validity) of the study results                                                                                                                                        | 12    |
| <b>Other information</b> |     |                                                                                                                                                                                                              |       |
| Funding                  | 22  | Give the source of funding and the role of the funders for the present study and, if applicable, for the original study on which the present article is based                                                | 13    |

\*Give information separately for cases and controls in case-control studies and, if applicable, for exposed and unexposed groups in cohort and cross-sectional studies.

**Note:** An Explanation and Elaboration article discusses each checklist item and gives methodological background and published examples of transparent reporting. The STROBE checklist is best used in conjunction with this article (freely available on the Web sites of PLoS Medicine at <http://www.plosmedicine.org/>, Annals of Internal Medicine at <http://www.annals.org/>, and Epidemiology at <http://www.epidem.com/>). Information on the STROBE Initiative is available at [www.strobe-statement.org](http://www.strobe-statement.org).
